# Supplementary material
Source: MDPI journal article supplement (https://www.mdpi.com/1424-2818/12/2/44)
Supplement: s1 [file s1]

**Supplementary Table S4** Allele distribution and frequency in samples from Italian (I) and Balkan/Pannonian regions (B).

| MA4         |              |              | MA7         |       |       | MA14        |              |              | MA12        |       |       |
|-------------|--------------|--------------|-------------|-------|-------|-------------|--------------|--------------|-------------|-------|-------|
| Alleles     | I            | B            | Alleles     | I     | B     | Alleles     | I            | B            | Alleles     | I     | B     |
| <b>146*</b> | 0.003        |              | <b>202*</b> | 0.003 |       | <b>142</b>  | 0.012        | 0.090        | <b>126*</b> |       | 0.010 |
| <b>148</b>  | 0.006        |              | <b>210</b>  | 0.006 |       | <b>144</b>  | 0.056        | 0.030        | <b>128*</b> |       | 0.010 |
| <b>150*</b> | 0.003        |              | <b>212</b>  | 0.892 | 1.000 | <b>146</b>  | 0.003        | 0.010        | <b>130*</b> |       | 0.010 |
| <b>152*</b> | 0.009        |              | <b>214</b>  | 0.096 |       | <b>148</b>  | 0.009        | 0.110        | <b>132</b>  | 0.435 | 0.667 |
| <b>156</b>  | 0.034        | 0.019        | <b>216*</b> | 0.003 |       | <b>162</b>  | 0.006        |              | <b>134</b>  | 0.488 | 0.275 |
| <b>158*</b> | 0.003        |              |             |       |       | <b>164*</b> | 0.003        |              | <b>136</b>  | 0.077 | 0.029 |
| <b>162</b>  | <u>0.133</u> | <u>0.417</u> |             |       |       | <b>166</b>  |              | 0.020        |             |       |       |
| <b>164</b>  | 0.401        | 0.427        |             |       |       | <b>168</b>  | 0.390        | 0.090        |             |       |       |
| <b>166</b>  | 0.019        | 0.049        |             |       |       | <b>170</b>  | 0.012        | 0.090        |             |       |       |
| <b>170*</b> | 0.003        |              |             |       |       | <b>172</b>  | <u>0.031</u> | <u>0.220</u> |             |       |       |
| <b>172*</b> | 0.003        |              |             |       |       | <b>174</b>  | 0.406        | 0.300        |             |       |       |
| <b>178*</b> | 0.006        |              |             |       |       | <b>176</b>  | 0.059        | 0.030        |             |       |       |
| <b>180</b>  |              | 0.029        |             |       |       | <b>178</b>  | 0.012        | 0.010        |             |       |       |
| <b>182</b>  | 0.312        | 0.049        |             |       |       |             |              |              |             |       |       |
| <b>184</b>  | 0.015        | 0.010        |             |       |       |             |              |              |             |       |       |
| <b>186*</b> | 0.006        |              |             |       |       |             |              |              |             |       |       |
| <b>196</b>  | 0.031        |              |             |       |       |             |              |              |             |       |       |
| <b>198*</b> | 0.009        |              |             |       |       |             |              |              |             |       |       |
| <b>200*</b> | 0.003        |              |             |       |       |             |              |              |             |       |       |
| MA19        |              |              | MA51        |       |       | MA21        |              |              | MA13        |       |       |
| Alleles     | I            | B            | Alleles     | I     | B     | Alleles     | I            | B            | Alleles     | I     | B     |
| <b>110</b>  | 0.275        | 0.206        | <b>59</b>   | 0.056 | 0.010 | <b>105*</b> | 0.003        |              | <b>92</b>   | 0.065 |       |
| <b>121*</b> |              | 0.010        | <b>63</b>   | 0.150 | 0.165 | <b>117</b>  | 0.009        | 0.050        | <b>247</b>  | 0.914 | 1.000 |
| <b>123</b>  | 0.722        | 0.725        | <b>65</b>   | 0.140 | 0.144 | <b>119</b>  | 0.071        | 0.130        | <b>249</b>  | 0.022 |       |
| <b>125</b>  | 0.003        | 0.049        | <b>67</b>   | 0.069 | 0.103 | <b>121</b>  | <u>0.419</u> | <u>0.130</u> |             |       |       |
| <b>127*</b> |              | 0.010        | <b>69</b>   | 0.131 | 0.227 | <b>123</b>  | 0.081        | 0.120        |             |       |       |
|             |              |              | <b>70*</b>  | 0.003 |       | <b>124*</b> |              | 0.010        |             |       |       |
|             |              |              | <b>71</b>   | 0.168 | 0.165 | <b>125</b>  | 0.115        | 0.260        |             |       |       |
|             |              |              | <b>73</b>   | 0.274 | 0.103 | <b>127</b>  | 0.236        | 0.260        |             |       |       |
|             |              |              | <b>75</b>   | 0.006 | 0.041 | <b>129</b>  | 0.034        | 0.030        |             |       |       |
|             |              |              | <b>77*</b>  | 0.003 |       | <b>131</b>  | 0.006        |              |             |       |       |
|             |              |              | <b>81*</b>  |       | 0.041 | <b>135*</b> | 0.003        |              |             |       |       |
|             |              |              |             |       |       | <b>154*</b> | 0.003        |              |             |       |       |
|             |              |              |             |       |       | <b>156</b>  | 0.016        |              |             |       |       |
|             |              |              |             |       |       | <b>158*</b> | 0.003        |              |             |       |       |
|             |              |              |             |       |       | <b>161*</b> |              | 0.010        |             |       |       |

Underscored values indicate alleles with relevant difference in frequency, \* Indicates private alleles for single populations.
