# Supplementary material
Source: MDPI journal article supplement (https://www.mdpi.com/1424-2818/12/2/44)
Supplement: s1 [file s1]

**Supplementary Table S5** List of MLG and results of MLGsim analysis. Populations are indicated when identical MLG are found.

| MLG   | n | P <sub>Sex</sub> | Significance | Level | P <sub>Gen</sub> | Ma4 | Ma7 | Ma14 | Ma12 | Ma19 | Ma51 | Ma21 | Ma13 | Populations |
|-------|---|------------------|--------------|-------|------------------|-----|-----|------|------|------|------|------|------|-------------|
| MLG1  | 1 | -                | -            | -     | 9,93E-02         | 0   | 212 | 148  | 132  | 123  | 63   | 125  | 247  |             |
| MLG2  | 1 | -                | -            | -     | 6,53E-01         | 0   | 212 | 174  | 132  | 123  | 69   | 119  | 247  |             |
| MLG3  | 1 | -                | -            | -     | 4,99E-02         | 146 | 212 | 168  | 134  | 123  | 65   | 117  | 247  |             |
| MLG4  | 1 | -                | -            | -     | 3,07E+00         | 148 | 212 | 168  | 134  | 123  | 73   | 121  | 247  |             |
| MLG5  | 1 | -                | -            | -     | 1,14E+00         | 148 | 212 | 174  | 132  | 123  | 63   | 125  | 247  |             |
| MLG6  | 1 | -                | -            | -     | 5,00E-01         | 150 | 212 | 174  | 132  | 123  | 73   | 119  | 247  |             |
| MLG7  | 1 | -                | -            | -     | 6,16E+00         | 152 | 212 | 174  | 132  | 123  | 73   | 121  | 247  |             |
| MLG8  | 1 | -                | -            | -     | 2,28E+00         | 152 | 212 | 174  | 134  | 123  | 65   | 127  | 247  |             |
| MLG9  | 1 | -                | -            | -     | 3,78E+00         | 152 | 212 | 174  | 134  | 123  | 73   | 127  | 247  |             |
| MLG10 | 1 | -                | -            | -     | 2,91E-03         | 156 | 212 | 142  | 132  | 127  | 65   | 127  | 247  |             |
| MLG11 | 1 | -                | -            | -     | 7,89E-03         | 156 | 212 | 142  | 136  | 123  | 0    | 119  | 247  |             |
| MLG12 | 1 | -                | -            | -     | 2,82E-02         | 156 | 212 | 144  | 132  | 125  | 65   | 127  | 247  |             |
| MLG13 | 1 | -                | -            | -     | 5,12E+00         | 156 | 212 | 168  | 134  | 123  | 73   | 123  | 247  |             |
| MLG14 | 1 | -                | -            | -     | 9,54E+00         | 156 | 212 | 174  | 132  | 110  | 73   | 121  | 247  |             |
| MLG15 | 1 | -                | -            | -     | 0.000267065      | 156 | 212 | 174  | 132  | 123  | 73   | 121  | 247  |             |
| MLG16 | 1 | -                | -            | -     | 3,32E-01         | 156 | 212 | 178  | 134  | 123  | 63   | 127  | 247  |             |
| MLG17 | 1 | -                | -            | -     | 1,22E-02         | 156 | 214 | 0    | 134  | 123  | 71   | 119  | 247  |             |
| MLG18 | 1 | -                | -            | -     | 1,61E-01         | 156 | 214 | 144  | 134  | 123  | 69   | 121  | 247  |             |
| MLG19 | 1 | -                | -            | -     | 1,17E-03         | 156 | 214 | 144  | 136  | 123  | 65   | 121  | 92   |             |
| MLG20 | 1 | -                | -            | -     | 1,27E-03         | 156 | 214 | 144  | 136  | 123  | 69   | 121  | 92   |             |
| MLG21 | 1 | -                | -            | -     | 1,02E-04         | 156 | 214 | 146  | 136  | 123  | 0    | 123  | 247  |             |
| MLG22 | 1 | -                | -            | -     | 2,49E-03         | 156 | 214 | 174  | 136  | 123  | 69   | 123  | 92   |             |
| MLG23 | 1 | -                | -            | -     | 7,75E-01         | 158 | 212 | 168  | 132  | 123  | 63   | 127  | 247  |             |
| MLG24 | 1 | -                | -            | -     | 1,06E+00         | 162 | 212 | 0    | 132  | 110  | 69   | 127  | 247  |             |
| MLG25 | 1 | -                | -            | -     | 9,15E-01         | 162 | 212 | 0    | 132  | 123  | 67   | 125  | 247  |             |
| MLG26 | 1 | -                | -            | -     | 1,83E+00         | 162 | 212 | 0    | 132  | 123  | 69   | 125  | 247  |             |
| MLG27 | 1 | -                | -            | -     | 9,31E-01         | 162 | 212 | 0    | 134  | 123  | 69   | 119  | 247  |             |
| MLG28 | 1 | -                | -            | -     | 1,31E+00         | 162 | 212 | 142  | 132  | 110  | 65   | 125  | 247  |             |
| MLG29 | 1 | -                | -            | -     | 1,19E-02         | 162 | 212 | 142  | 132  | 121  | 65   | 125  | 247  |             |
| MLG30 | 1 | -                | -            | -     | 6,07E+00         | 162 | 212 | 142  | 132  | 123  | 73   | 125  | 247  |             |
| MLG31 | 4 | 3,54E-08         | 0            | ***   | 4,01E-01         | 162 | 212 | 142  | 132  | 123  | 81   | 127  | 247  | 35          |
| MLG32 | 1 | -                | -            | -     | 3,32E-01         | 162 | 212 | 142  | 136  | 123  | 71   | 119  | 247  |             |
| MLG33 | 1 | -                | -            | -     | 7,52E-01         | 162 | 212 | 144  | 132  | 123  | 67   | 121  | 247  |             |
| MLG34 | 1 | -                | -            | -     | 8,72E-01         | 162 | 212 | 148  | 132  | 110  | 69   | 119  | 247  |             |
| MLG35 | 1 | -                | -            | -     | 9,25E+00         | 162 | 212 | 148  | 132  | 123  | 65   | 121  | 247  |             |
| MLG36 | 1 | -                | -            | -     | 3,94E+00         | 162 | 212 | 148  | 132  | 123  | 65   | 125  | 247  |             |
| MLG37 | 1 | -                | -            | -     | 4,75E-01         | 162 | 212 | 148  | 132  | 123  | 69   | 0    | 247  |             |
| MLG38 | 1 | -                | -            | -     | 5,42E-01         | 162 | 212 | 148  | 132  | 123  | 69   | 117  | 247  |             |
| MLG39 | 1 | -                | -            | -     | 2,44E+00         | 162 | 212 | 148  | 132  | 123  | 69   | 119  | 247  |             |
| MLG40 | 1 | -                | -            | -     | 1,57E-01         | 162 | 212 | 148  | 132  | 123  | 70   | 121  | 247  |             |
| MLG41 | 1 | -                | -            | -     | 6,67E-01         | 162 | 212 | 166  | 132  | 123  | 71   | 125  | 247  |             |
| MLG42 | 1 | -                | -            | -     | 0.000333382      | 162 | 212 | 168  | 132  | 123  | 67   | 127  | 247  |             |
| MLG43 | 1 | -                | -            | -     | 0.000666764      | 162 | 212 | 168  | 132  | 123  | 69   | 127  | 247  |             |
| MLG44 | 2 | 0.0764922        | 0.597799     | ns    | 0.00105816       | 162 | 212 | 168  | 132  | 123  | 71   | 121  | 247  | 6, 7        |

|       |   |            |           |     |             |     |     |     |     |     |    |     |     |          |
|-------|---|------------|-----------|-----|-------------|-----|-----|-----|-----|-----|----|-----|-----|----------|
| MLG45 | 2 | 0.133643   | 0.75362   | ns  | 0.00148143  | 162 | 212 | 168 | 132 | 123 | 73 | 121 | 247 | 6, 8     |
| MLG46 | 1 | -          | -         | -   | 0.000649018 | 162 | 212 | 168 | 134 | 123 | 71 | 127 | 247 |          |
| MLG47 | 3 | 0.00735286 | 0.17783   | ns  | 0.000908625 | 162 | 212 | 168 | 134 | 123 | 73 | 127 | 247 | 7, 9, 12 |
| MLG48 | 1 | -          | -         | -   | 0.000136782 | 162 | 212 | 168 | 136 | 123 | 73 | 127 | 247 |          |
| MLG49 | 1 | -          | -         | -   | 3,43E-02    | 162 | 212 | 170 | 0   | 123 | 63 | 123 | 247 |          |
| MLG50 | 3 | 2,08E-05   | 0         | *** | 2,52E-01    | 162 | 212 | 170 | 132 | 123 | 67 | 117 | 247 | 32       |
| MLG51 | 2 | 0.00061639 | 0.0414963 | *   | 8,29E+00    | 162 | 212 | 170 | 134 | 123 | 63 | 121 | 247 | 33       |
| MLG52 | 1 | -          | -         | -   | 2,13E+00    | 162 | 212 | 170 | 134 | 123 | 63 | 123 | 247 |          |
| MLG53 | 1 | -          | -         | -   | 5,43E-02    | 162 | 212 | 172 | 132 | 0   | 69 | 119 | 247 |          |
| MLG54 | 1 | -          | -         | -   | 1,68E-01    | 162 | 212 | 172 | 132 | 123 | 0  | 125 | 247 |          |
| MLG55 | 2 | 0.00386434 | 0.126132  | ns  | 0.000211408 | 162 | 212 | 172 | 132 | 123 | 65 | 121 | 247 | 32, 35   |
| MLG56 | 1 | -          | -         | -   | 5,43E+00    | 162 | 212 | 172 | 132 | 123 | 65 | 123 | 247 |          |
| MLG57 | 1 | -          | -         | -   | 6,20E-01    | 162 | 212 | 172 | 132 | 123 | 67 | 117 | 247 |          |
| MLG58 | 1 | -          | -         | -   | 5,58E+00    | 162 | 212 | 172 | 132 | 123 | 69 | 119 | 247 |          |
| MLG59 | 1 | -          | -         | -   | 1,55E-01    | 162 | 212 | 172 | 132 | 123 | 69 | 161 | 247 |          |
| MLG60 | 2 | 0.0036088  | 0.121012  | ns  | 0.000204088 | 162 | 212 | 172 | 134 | 123 | 63 | 121 | 247 | 34       |
| MLG61 | 1 | -          | -         | -   | 2,96E+00    | 162 | 212 | 172 | 134 | 123 | 73 | 129 | 247 |          |
| MLG62 | 1 | -          | -         | -   | 2,58E-04    | 162 | 212 | 174 | 0   | 110 | 65 | 0   | 247 |          |
| MLG63 | 1 | -          | -         | -   | 7,75E-01    | 162 | 212 | 174 | 132 | 0   | 69 | 127 | 247 |          |
| MLG64 | 1 | -          | -         | -   | 0.000161703 | 162 | 212 | 174 | 132 | 110 | 65 | 125 | 247 |          |
| MLG65 | 1 | -          | -         | -   | 0.000261805 | 162 | 212 | 174 | 132 | 110 | 65 | 127 | 247 |          |
| MLG66 | 1 | -          | -         | -   | 0.000145807 | 162 | 212 | 174 | 132 | 123 | 59 | 125 | 247 |          |
| MLG67 | 1 | -          | -         | -   | 0.000733055 | 162 | 212 | 174 | 132 | 123 | 65 | 127 | 247 |          |
| MLG68 | 1 | -          | -         | -   | 0.000296243 | 162 | 212 | 174 | 132 | 123 | 69 | 123 | 247 |          |
| MLG69 | 1 | -          | -         | -   | 0.000795178 | 162 | 212 | 174 | 132 | 123 | 69 | 127 | 247 |          |
| MLG70 | 1 | -          | -         | -   | 0.000306962 | 162 | 212 | 174 | 132 | 123 | 71 | 119 | 247 |          |
| MLG71 | 1 | -          | -         | -   | 0.00126196  | 162 | 212 | 174 | 132 | 123 | 71 | 121 | 247 |          |
| MLG72 | 2 | 0.0544214  | 0.512552  | ns  | 0.000869726 | 162 | 212 | 174 | 132 | 123 | 71 | 127 | 247 | 32, 36   |
| MLG73 | 1 | -          | -         | -   | 5,32E-02    | 162 | 212 | 174 | 132 | 125 | 67 | 0   | 247 |          |
| MLG74 | 1 | -          | -         | -   | 0.00012637  | 162 | 212 | 174 | 134 | 110 | 67 | 127 | 247 |          |
| MLG75 | 1 | -          | -         | -   | 0.000276434 | 162 | 212 | 174 | 134 | 110 | 71 | 127 | 247 |          |
| MLG76 | 1 | -          | -         | -   | 0.00043709  | 162 | 212 | 174 | 134 | 123 | 63 | 125 | 247 |          |
| MLG77 | 1 | -          | -         | -   | 0.000513408 | 162 | 212 | 174 | 134 | 123 | 67 | 121 | 247 |          |
| MLG78 | 1 | -          | -         | -   | 0.000288358 | 162 | 212 | 174 | 134 | 123 | 71 | 123 | 247 |          |
| MLG79 | 1 | -          | -         | -   | 9,82E+00    | 162 | 212 | 174 | 136 | 123 | 65 | 127 | 247 |          |
| MLG80 | 1 | -          | -         | -   | 0.00015766  | 162 | 212 | 176 | 132 | 123 | 63 | 121 | 247 |          |
| MLG81 | 1 | -          | -         | -   | 0.000100169 | 162 | 212 | 176 | 132 | 123 | 65 | 127 | 247 |          |
| MLG82 | 1 | -          | -         | -   | 0.000166382 | 162 | 212 | 176 | 132 | 123 | 73 | 127 | 247 |          |
| MLG83 | 1 | -          | -         | -   | 5,48E+00    | 162 | 212 | 176 | 134 | 110 | 71 | 121 | 247 |          |
| MLG84 | 1 | -          | -         | -   | 0.00014031  | 162 | 212 | 176 | 134 | 123 | 63 | 121 | 247 |          |
| MLG85 | 3 | 3,14E-09   | 0         | *** | 8,37E-03    | 162 | 214 | 144 | 136 | 123 | 69 | 121 | 92  | 2        |
| MLG86 | 1 | -          | -         | -   | 2,15E-03    | 162 | 214 | 144 | 136 | 123 | 69 | 123 | 92  |          |
| MLG87 | 1 | -          | -         | -   | 9,16E-03    | 162 | 214 | 144 | 136 | 123 | 71 | 121 | 92  |          |
| MLG88 | 1 | -          | -         | -   | 7,67E+00    | 162 | 214 | 168 | 132 | 123 | 69 | 121 | 247 |          |
| MLG89 | 1 | -          | -         | -   | 7,47E+00    | 162 | 214 | 168 | 134 | 123 | 71 | 121 | 247 |          |
| MLG90 | 1 | -          | -         | -   | 5,38E-02    | 162 | 214 | 168 | 136 | 123 | 69 | 121 | 92  |          |
| MLG91 | 1 | -          | -         | -   | 3,60E+00    | 162 | 214 | 174 | 132 | 123 | 73 | 123 | 247 |          |

|        |   |           |          |     |             |     |     |     |     |     |    |     |     |             |
|--------|---|-----------|----------|-----|-------------|-----|-----|-----|-----|-----|----|-----|-----|-------------|
| MLG92  | 1 | -         | -        | -   | 6,42E-02    | 162 | 214 | 174 | 136 | 123 | 69 | 121 | 92  |             |
| MLG93  | 1 | -         | -        | -   | 7,02E-02    | 162 | 214 | 174 | 136 | 123 | 71 | 121 | 92  |             |
| MLG94  | 1 | -         | -        | -   | 1,34E+00    | 162 | 214 | 174 | 136 | 123 | 71 | 121 | 247 |             |
| MLG95  | 1 | -         | -        | -   | 1,95E-01    | 164 | 210 | 172 | 134 | 123 | 65 | 121 | 247 |             |
| MLG96  | 1 | -         | -        | -   | 3,05E-02    | 164 | 212 | 0   | 136 | 110 | 0  | 125 | 247 |             |
| MLG97  | 1 | -         | -        | -   | 8,46E-02    | 164 | 212 | 142 | 136 | 110 | 75 | 121 | 247 |             |
| MLG98  | 1 | -         | -        | -   | 0.000129613 | 164 | 212 | 144 | 132 | 123 | 63 | 125 | 247 |             |
| MLG99  | 1 | -         | -        | -   | 0.000119487 | 164 | 212 | 144 | 132 | 123 | 65 | 125 | 247 |             |
| MLG100 | 1 | -         | -        | -   | 0.000333034 | 164 | 212 | 144 | 132 | 123 | 71 | 121 | 247 |             |
| MLG101 | 2 | 1,73E-03  | 7,64E+00 | *** | 4,34E-02    | 164 | 212 | 144 | 132 | 125 | 0  | 125 | 247 | 35          |
| MLG102 | 1 | -         | -        | -   | 2,82E-01    | 164 | 212 | 146 | 134 | 123 | 71 | 121 | 247 |             |
| MLG103 | 1 | -         | -        | -   | 4,13E-02    | 164 | 212 | 148 | 126 | 123 | 69 | 125 | 247 |             |
| MLG104 | 1 | -         | -        | -   | 1,76E+00    | 164 | 212 | 148 | 132 | 110 | 69 | 119 | 247 |             |
| MLG105 | 1 | -         | -        | -   | 8,64E+00    | 164 | 212 | 148 | 132 | 123 | 69 | 125 | 247 |             |
| MLG106 | 1 | -         | -        | -   | 1,50E-01    | 164 | 212 | 148 | 132 | 123 | 71 | 124 | 247 |             |
| MLG107 | 1 | -         | -        | -   | 4,64E+00    | 164 | 212 | 148 | 134 | 123 | 63 | 123 | 247 |             |
| MLG108 | 1 | -         | -        | -   | 4,05E+00    | 164 | 212 | 148 | 134 | 123 | 65 | 119 | 247 |             |
| MLG109 | 1 | -         | -        | -   | 1,35E+00    | 164 | 212 | 162 | 132 | 123 | 71 | 125 | 247 |             |
| MLG110 | 1 | -         | -        | -   | 2,38E+00    | 164 | 212 | 162 | 134 | 123 | 65 | 121 | 247 |             |
| MLG111 | 1 | -         | -        | -   | 7,45E-01    | 164 | 212 | 166 | 132 | 123 | 69 | 123 | 247 |             |
| MLG112 | 1 | -         | -        | -   | 8,83E+00    | 164 | 212 | 168 | 132 | 110 | 59 | 125 | 247 |             |
| MLG113 | 1 | -         | -        | -   | 0.000699079 | 164 | 212 | 168 | 132 | 110 | 63 | 121 | 247 |             |
| MLG114 | 2 | 0.0186012 | 0.300485 | ns  | 0.000481798 | 164 | 212 | 168 | 132 | 110 | 63 | 127 | 247 | 26, 30      |
| MLG115 | 2 | 0.0159758 | 0.273318 | ns  | 0.000444157 | 164 | 212 | 168 | 132 | 110 | 65 | 127 | 247 | 30, 32      |
| MLG116 | 1 | -         | -        | -   | 0.000297581 | 164 | 212 | 168 | 132 | 110 | 69 | 125 | 247 |             |
| MLG117 | 1 | -         | -        | -   | 2,36E+00    | 164 | 212 | 168 | 132 | 110 | 69 | 156 | 247 |             |
| MLG118 | 2 | 0.0033467 | 0.116121 | ns  | 0.000196321 | 164 | 212 | 168 | 132 | 110 | 71 | 123 | 247 | 15, 20      |
| MLG119 | 1 | -         | -        | -   | 5,50E+00    | 164 | 212 | 168 | 132 | 123 | 59 | 129 | 247 |             |
| MLG120 | 2 | 0.0201233 | 0.317947 | ns  | 0.000502581 | 164 | 212 | 168 | 132 | 123 | 63 | 123 | 247 | 12, 16      |
| MLG121 | 1 | -         | -        | -   | 0.000833227 | 164 | 212 | 168 | 132 | 123 | 63 | 125 | 247 |             |
| MLG122 | 2 | 0.0172908 | 0.282641 | ns  | 0.000463317 | 164 | 212 | 168 | 132 | 123 | 65 | 123 | 247 | 12, 16      |
| MLG123 | 1 | -         | -        | -   | 0.00195742  | 164 | 212 | 168 | 132 | 123 | 69 | 121 | 247 |             |
| MLG124 | 1 | -         | -        | -   | 0.00214093  | 164 | 212 | 168 | 132 | 123 | 71 | 121 | 247 |             |
| MLG125 | 4 | 0.0414438 | 0.44855  | ns  | 0.0029973   | 164 | 212 | 168 | 132 | 123 | 73 | 121 | 247 | 6, 7, 9, 20 |
| MLG126 | 1 | -         | -        | -   | 1,25E-01    | 164 | 212 | 168 | 134 | 110 | 59 | 154 | 247 |             |
| MLG127 | 1 | -         | -        | -   | 0.000264833 | 164 | 212 | 168 | 134 | 110 | 69 | 125 | 247 |             |
| MLG128 | 1 | -         | -        | -   | 0.000356421 | 164 | 212 | 168 | 134 | 123 | 59 | 127 | 247 |             |
| MLG129 | 1 | -         | -        | -   | 8,24E+00    | 164 | 212 | 168 | 134 | 123 | 63 | 0   | 247 |             |
| MLG130 | 1 | -         | -        | -   | 0.00174201  | 164 | 212 | 168 | 134 | 123 | 63 | 121 | 247 |             |
| MLG131 | 1 | -         | -        | -   | 0.00120058  | 164 | 212 | 168 | 134 | 123 | 63 | 127 | 247 |             |
| MLG132 | 1 | -         | -        | -   | 0.00110678  | 164 | 212 | 168 | 134 | 123 | 65 | 127 | 247 |             |
| MLG133 | 2 | 0.0545624 | 0.514424 | ns  | 0.000871006 | 164 | 212 | 168 | 134 | 123 | 67 | 121 | 247 | 7, 20       |
| MLG134 | 2 | 0.172333  | 0.813076 | ns  | 0.00174201  | 164 | 212 | 168 | 134 | 123 | 69 | 121 | 247 | 6, 9        |
| MLG135 | 1 | -         | -        | -   | 1,29E+00    | 164 | 212 | 168 | 134 | 123 | 71 | 105 | 247 |             |
| MLG136 | 3 | 0.0497883 | 0.493027 | ns  | 0.00190533  | 164 | 212 | 168 | 134 | 123 | 71 | 121 | 247 | 6, 17, 20   |
| MLG137 | 2 | 0.109889  | 0.706202 | ns  | 0.00131313  | 164 | 212 | 168 | 134 | 123 | 71 | 127 | 247 | 18, 20      |
| MLG138 | 1 | -         | -        | -   | 0.000139692 | 164 | 212 | 168 | 134 | 123 | 73 | 121 | 92  |             |

|        |   |            |          |    |             |     |     |     |     |     |    |     |     |              |
|--------|---|------------|----------|----|-------------|-----|-----|-----|-----|-----|----|-----|-----|--------------|
| MLG139 | 4 | 0.0289447  | 0.377402 | ns | 0.00266746  | 164 | 212 | 168 | 134 | 123 | 73 | 121 | 247 | 5, 8, 18, 20 |
| MLG140 | 1 | -          | -        | -  | 0.000684887 | 164 | 212 | 168 | 134 | 123 | 73 | 123 | 247 |              |
| MLG141 | 1 | -          | -        | -  | 0.00113547  | 164 | 212 | 168 | 134 | 123 | 73 | 125 | 247 |              |
| MLG142 | 1 | -          | -        | -  | 9,63E+00    | 164 | 212 | 168 | 134 | 123 | 73 | 127 | 92  |              |
| MLG143 | 4 | 0.00857654 | 0.197088 | ns | 0.00183838  | 164 | 212 | 168 | 134 | 123 | 73 | 127 | 247 | 9,16, 18, 27 |
| MLG144 | 1 | -          | -        | -  | 4,13E-01    | 164 | 212 | 168 | 134 | 125 | 67 | 119 | 247 |              |
| MLG145 | 1 | -          | -        | -  | 3,34E-02    | 164 | 212 | 168 | 136 | 123 | 69 | 119 | 92  |              |
| MLG146 | 1 | -          | -        | -  | 5,01E+00    | 164 | 212 | 170 | 132 | 123 | 71 | 119 | 247 |              |
| MLG147 | 1 | -          | -        | -  | 6,60E-02    | 164 | 212 | 170 | 136 | 110 | 0  | 125 | 247 |              |
| MLG148 | 1 | -          | -        | -  | 1,10E-01    | 164 | 212 | 172 | 132 | 0   | 69 | 119 | 247 |              |
| MLG149 | 1 | -          | -        | -  | 0.000105282 | 164 | 212 | 172 | 132 | 110 | 65 | 127 | 247 |              |
| MLG150 | 1 | -          | -        | -  | 8,29E+00    | 164 | 212 | 172 | 132 | 110 | 67 | 121 | 247 |              |
| MLG151 | 1 | -          | -        | -  | 4,41E+00    | 164 | 212 | 172 | 132 | 110 | 71 | 119 | 247 |              |
| MLG152 | 1 | -          | -        | -  | 0.000124911 | 164 | 212 | 172 | 132 | 110 | 71 | 127 | 247 |              |
| MLG153 | 1 | -          | -        | -  | 3,77E-01    | 164 | 212 | 172 | 132 | 123 | 0  | 0   | 247 |              |
| MLG154 | 1 | -          | -        | -  | 5,96E+00    | 164 | 212 | 172 | 132 | 123 | 67 | 123 | 247 |              |
| MLG155 | 1 | -          | -        | -  | 0.000123441 | 164 | 212 | 172 | 132 | 123 | 71 | 119 | 247 |              |
| MLG156 | 1 | -          | -        | -  | 0.00050748  | 164 | 212 | 172 | 132 | 123 | 71 | 121 | 247 |              |
| MLG157 | 1 | -          | -        | -  | 3,79E+00    | 164 | 212 | 172 | 134 | 110 | 63 | 123 | 247 |              |
| MLG158 | 1 | -          | -        | -  | 0.000161297 | 164 | 212 | 172 | 134 | 110 | 71 | 121 | 247 |              |
| MLG159 | 1 | -          | -        | -  | 5,89E-01    | 164 | 212 | 172 | 134 | 110 | 75 | 125 | 247 |              |
| MLG160 | 1 | -          | -        | -  | 0.000162344 | 164 | 212 | 172 | 134 | 123 | 73 | 123 | 247 |              |
| MLG161 | 1 | -          | -        | -  | 1,03E+00    | 164 | 212 | 174 | 130 | 123 | 65 | 121 | 247 |              |
| MLG162 | 1 | -          | -        | -  | 0.000768583 | 164 | 212 | 174 | 132 | 110 | 65 | 121 | 247 |              |
| MLG163 | 1 | -          | -        | -  | 2,60E+00    | 164 | 212 | 174 | 132 | 110 | 65 | 156 | 247 |              |
| MLG164 | 1 | -          | -        | -  | 5,19E-01    | 164 | 212 | 174 | 132 | 110 | 65 | 158 | 247 |              |
| MLG165 | 1 | -          | -        | -  | 0.000177446 | 164 | 212 | 174 | 132 | 110 | 67 | 125 | 247 |              |
| MLG166 | 1 | -          | -        | -  | 7,89E+00    | 164 | 212 | 174 | 132 | 110 | 69 | 129 | 247 |              |
| MLG167 | 1 | -          | -        | -  | 0.000628456 | 164 | 212 | 174 | 132 | 110 | 71 | 127 | 247 |              |
| MLG168 | 1 | -          | -        | -  | 1,23E+00    | 164 | 212 | 174 | 132 | 110 | 71 | 131 | 247 |              |
| MLG169 | 1 | -          | -        | -  | 0.00127663  | 164 | 212 | 174 | 132 | 110 | 73 | 121 | 247 |              |
| MLG170 | 1 | -          | -        | -  | 0.000879839 | 164 | 212 | 174 | 132 | 110 | 73 | 127 | 247 |              |
| MLG171 | 1 | -          | -        | -  | 0.000177939 | 164 | 212 | 174 | 132 | 123 | 59 | 123 | 247 |              |
| MLG172 | 2 | 0.152318   | 0.794773 | ns | 0.00160885  | 164 | 212 | 174 | 132 | 123 | 63 | 127 | 247 | 26, 27       |
| MLG173 | 1 | -          | -        | -  | 0.00148316  | 164 | 212 | 174 | 132 | 123 | 65 | 127 | 247 |              |
| MLG174 | 1 | -          | -        | -  | 0.000203571 | 164 | 212 | 174 | 132 | 123 | 65 | 129 | 247 |              |
| MLG175 | 1 | -          | -        | -  | 0.0011672   | 164 | 212 | 174 | 132 | 123 | 67 | 121 | 247 |              |
| MLG176 | 1 | -          | -        | -  | 0.000567829 | 164 | 212 | 174 | 132 | 123 | 69 | 119 | 247 |              |
| MLG177 | 2 | 0.0686594  | 0.578312 | ns | 0.0009937   | 164 | 212 | 174 | 132 | 123 | 69 | 125 | 247 | 29           |
| MLG178 | 1 | -          | -        | -  | 0.00160885  | 164 | 212 | 174 | 132 | 123 | 69 | 127 | 247 |              |
| MLG179 | 1 | -          | -        | -  | 0.00175968  | 164 | 212 | 174 | 132 | 123 | 71 | 127 | 247 |              |
| MLG180 | 1 | -          | -        | -  | 0.00357456  | 164 | 212 | 174 | 132 | 123 | 73 | 121 | 247 |              |
| MLG181 | 1 | -          | -        | -  | 0.0015216   | 164 | 212 | 174 | 132 | 123 | 73 | 125 | 247 |              |
| MLG182 | 1 | -          | -        | -  | 0.00246355  | 164 | 212 | 174 | 132 | 123 | 73 | 127 | 247 |              |
| MLG183 | 1 | -          | -        | -  | 0.000218851 | 164 | 212 | 174 | 132 | 123 | 75 | 121 | 247 |              |
| MLG184 | 1 | -          | -        | -  | 0.000220272 | 164 | 212 | 174 | 134 | 110 | 59 | 121 | 247 |              |
| MLG185 | 1 | -          | -        | -  | 0.000151809 | 164 | 212 | 174 | 134 | 110 | 59 | 127 | 247 |              |

|        |   |           |           |    |             |     |     |     |     |     |    |     |     |            |
|--------|---|-----------|-----------|----|-------------|-----|-----|-----|-----|-----|----|-----|-----|------------|
| MLG186 | 1 | -         | -         | -  | 0.000315838 | 164 | 212 | 174 | 134 | 110 | 63 | 125 | 247 |            |
| MLG187 | 1 | -         | -         | -  | 7,68E+00    | 164 | 212 | 174 | 134 | 110 | 71 | 129 | 247 |            |
| MLG188 | 4 | 7,39E-01  | 0.0025983 | ** | 0.000276358 | 164 | 212 | 174 | 134 | 110 | 73 | 119 | 247 | 16         |
| MLG189 | 2 | 0.086321  | 0.63834   | ns | 0.00113614  | 164 | 212 | 174 | 134 | 110 | 73 | 121 | 247 | 12, 20     |
| MLG190 | 2 | 0.0187331 | 0.301899  | ns | 0.000483627 | 164 | 212 | 174 | 134 | 110 | 73 | 125 | 247 | 14, 27     |
| MLG191 | 1 | -         | -         | -  | 0.000783014 | 164 | 212 | 174 | 134 | 110 | 73 | 127 | 247 |            |
| MLG192 | 1 | -         | -         | -  | 3,84E+00    | 164 | 212 | 174 | 134 | 110 | 73 | 156 | 247 |            |
| MLG193 | 1 | -         | -         | -  | 0.000616761 | 164 | 212 | 174 | 134 | 123 | 59 | 121 | 247 |            |
| MLG194 | 1 | -         | -         | -  | 3,63E+00    | 164 | 212 | 174 | 134 | 123 | 63 | 121 | 249 |            |
| MLG195 | 1 | -         | -         | -  | 0.000533415 | 164 | 212 | 174 | 134 | 123 | 63 | 123 | 247 |            |
| MLG196 | 1 | -         | -         | -  | 2,50E-01    | 164 | 212 | 174 | 134 | 123 | 63 | 127 | 249 |            |
| MLG197 | 1 | -         | -         | -  | 3,43E-01    | 164 | 212 | 174 | 134 | 123 | 63 | 129 | 249 |            |
| MLG198 | 1 | -         | -         | -  | 0.00191521  | 164 | 212 | 174 | 134 | 123 | 65 | 121 | 247 |            |
| MLG199 | 1 | -         | -         | -  | 0.000815256 | 164 | 212 | 174 | 134 | 123 | 65 | 125 | 247 |            |
| MLG200 | 1 | -         | -         | -  | 0.00050534  | 164 | 212 | 174 | 134 | 123 | 69 | 119 | 247 |            |
| MLG201 | 1 | -         | -         | -  | 0.00207751  | 164 | 212 | 174 | 134 | 123 | 69 | 121 | 247 |            |
| MLG202 | 1 | -         | -         | -  | 0.000196521 | 164 | 212 | 174 | 134 | 123 | 69 | 129 | 247 |            |
| MLG203 | 1 | -         | -         | -  | 2,14E-01    | 164 | 212 | 174 | 134 | 123 | 71 | 117 | 249 |            |
| MLG204 | 3 | 0.075517  | 0.595583  | ns | 0.00227228  | 164 | 212 | 174 | 134 | 123 | 71 | 121 | 247 | 7, 19, 20  |
| MLG205 | 1 | -         | -         | -  | 0.000583423 | 164 | 212 | 174 | 134 | 123 | 71 | 123 | 247 |            |
| MLG206 | 2 | 0.145985  | 0.780673  | ns | 0.00156603  | 164 | 212 | 174 | 134 | 123 | 71 | 127 | 247 | 4, 32      |
| MLG207 | 2 | 0.044236  | 0.459211  | ns | 0.000773803 | 164 | 212 | 174 | 134 | 123 | 73 | 119 | 247 | 14, 18     |
| MLG208 | 1 | -         | -         | -  | 0.00318119  | 164 | 212 | 174 | 134 | 123 | 73 | 121 | 247 |            |
| MLG209 | 1 | -         | -         | -  | 0.000816792 | 164 | 212 | 174 | 134 | 123 | 73 | 123 | 247 |            |
| MLG210 | 1 | -         | -         | -  | 0.00135415  | 164 | 212 | 174 | 134 | 123 | 73 | 125 | 247 |            |
| MLG211 | 3 | 0.0694978 | 0.582897  | ns | 0.00219244  | 164 | 212 | 174 | 134 | 123 | 73 | 127 | 247 | 14, 18, 27 |
| MLG212 | 1 | -         | -         | -  | 0.000134231 | 164 | 212 | 174 | 134 | 123 | 75 | 127 | 247 |            |
| MLG213 | 1 | -         | -         | -  | 4,47E-01    | 164 | 212 | 176 | 132 | 110 | 65 | 125 | 247 |            |
| MLG214 | 1 | -         | -         | -  | 0.000318987 | 164 | 212 | 176 | 132 | 123 | 63 | 121 | 247 |            |
| MLG215 | 1 | -         | -         | -  | 8,19E+00    | 164 | 212 | 176 | 132 | 123 | 63 | 123 | 247 |            |
| MLG216 | 1 | -         | -         | -  | 4,10E+00    | 164 | 212 | 176 | 132 | 123 | 67 | 123 | 247 |            |
| MLG217 | 1 | -         | -         | -  | 8,19E+00    | 164 | 212 | 176 | 132 | 123 | 69 | 123 | 247 |            |
| MLG218 | 1 | -         | -         | -  | 0.000155249 | 164 | 212 | 176 | 134 | 110 | 73 | 121 | 247 |            |
| MLG219 | 1 | -         | -         | -  | 0.000283883 | 164 | 212 | 176 | 134 | 123 | 63 | 121 | 247 |            |
| MLG220 | 1 | -         | -         | -  | 0.000283883 | 164 | 212 | 176 | 134 | 123 | 69 | 121 | 247 |            |
| MLG221 | 1 | -         | -         | -  | 0.000299588 | 164 | 212 | 176 | 134 | 123 | 73 | 127 | 247 |            |
| MLG222 | 1 | -         | -         | -  | 1,93E+00    | 164 | 212 | 178 | 132 | 123 | 71 | 119 | 247 |            |
| MLG223 | 1 | -         | -         | -  | 6,45E-01    | 164 | 212 | 178 | 134 | 123 | 69 | 121 | 247 |            |
| MLG224 | 1 | -         | -         | -  | 2,41E-01    | 164 | 214 | 144 | 132 | 123 | 69 | 121 | 247 |            |
| MLG225 | 1 | -         | -         | -  | 1,62E-02    | 164 | 214 | 144 | 136 | 123 | 67 | 121 | 247 |            |
| MLG226 | 1 | -         | -         | -  | 7,87E-02    | 164 | 214 | 144 | 136 | 123 | 69 | 119 | 247 |            |
| MLG227 | 1 | -         | -         | -  | 1,69E-02    | 164 | 214 | 144 | 136 | 123 | 69 | 121 | 92  |            |
| MLG228 | 1 | -         | -         | -  | 3,23E-02    | 164 | 214 | 144 | 136 | 123 | 69 | 121 | 247 |            |
| MLG229 | 1 | -         | -         | -  | 7,76E-01    | 164 | 214 | 168 | 132 | 123 | 67 | 121 | 247 |            |
| MLG230 | 1 | -         | -         | -  | 7,23E-01    | 164 | 214 | 168 | 134 | 123 | 69 | 121 | 92  |            |
| MLG231 | 1 | -         | -         | -  | 1,86E-01    | 164 | 214 | 168 | 134 | 123 | 69 | 123 | 92  |            |
| MLG232 | 1 | -         | -         | -  | 0.000151062 | 164 | 214 | 168 | 134 | 123 | 71 | 121 | 247 |            |

|        |   |           |            |    |             |     |     |     |     |     |    |     |     |          |
|--------|---|-----------|------------|----|-------------|-----|-----|-----|-----|-----|----|-----|-----|----------|
| MLG233 | 1 | -         | -          | -  | 6,21E+00    | 164 | 214 | 174 | 134 | 110 | 73 | 127 | 247 |          |
| MLG234 | 1 | -         | -          | -  | 1,10E-02    | 164 | 214 | 176 | 134 | 123 | 71 | 123 | 249 |          |
| MLG235 | 1 | -         | -          | -  | 2,66E-01    | 164 | 216 | 174 | 134 | 123 | 67 | 121 | 247 |          |
| MLG236 | 1 | -         | -          | -  | 6,54E-02    | 166 | 0   | 168 | 132 | 123 | 63 | 127 | 247 |          |
| MLG237 | 1 | -         | -          | -  | 1,83E-04    | 166 | 0   | 172 | 132 | 123 | 0  | 0   | 247 |          |
| MLG238 | 1 | -         | -          | -  | 9,20E-04    | 166 | 0   | 174 | 132 | 123 | 0  | 0   | 247 |          |
| MLG239 | 1 | -         | -          | -  | 2,96E+00    | 166 | 212 | 168 | 134 | 110 | 71 | 127 | 247 |          |
| MLG240 | 1 | -         | -          | -  | 7,59E+00    | 166 | 212 | 168 | 134 | 123 | 63 | 127 | 247 |          |
| MLG241 | 1 | -         | -          | -  | 9,47E-03    | 166 | 212 | 168 | 134 | 125 | 0  | 123 | 247 |          |
| MLG242 | 1 | -         | -          | -  | 6,10E-03    | 166 | 212 | 172 | 0   | 123 | 73 | 129 | 247 |          |
| MLG243 | 1 | -         | -          | -  | 0.000136048 | 166 | 212 | 174 | 132 | 123 | 65 | 121 | 247 |          |
| MLG244 | 1 | -         | -          | -  | 0.000155742 | 166 | 212 | 174 | 132 | 123 | 73 | 127 | 247 |          |
| MLG245 | 1 | -         | -          | -  | 0.00020111  | 166 | 212 | 174 | 134 | 123 | 73 | 121 | 247 |          |
| MLG246 | 1 | -         | -          | -  | 7,91E-01    | 166 | 212 | 176 | 132 | 123 | 65 | 125 | 247 |          |
| MLG247 | 1 | -         | -          | -  | 3,71E-02    | 170 | 212 | 178 | 134 | 123 | 69 | 121 | 247 |          |
| MLG248 | 1 | -         | -          | -  | 1,93E-02    | 172 | 212 | 142 | 132 | 110 | 67 | 121 | 247 |          |
| MLG249 | 2 | 9,46E-01  | 0.00320966 | ** | 1,02E+00    | 178 | 212 | 174 | 134 | 123 | 63 | 125 | 247 | 25       |
| MLG250 | 1 | -         | -          | -  | 8,15E-04    | 180 | 212 | 172 | 128 | 123 | 67 | 125 | 247 |          |
| MLG251 | 1 | -         | -          | -  | 1,22E+00    | 180 | 212 | 172 | 132 | 123 | 73 | 121 | 247 |          |
| MLG252 | 1 | -         | -          | -  | 8,82E-01    | 180 | 212 | 174 | 134 | 110 | 63 | 127 | 247 |          |
| MLG253 | 1 | -         | -          | -  | 1,42E-01    | 182 | 210 | 168 | 132 | 110 | 73 | 125 | 247 |          |
| MLG254 | 1 | -         | -          | -  | 4,33E-01    | 182 | 212 | 142 | 132 | 110 | 73 | 127 | 247 |          |
| MLG255 | 1 | -         | -          | -  | 6,22E+00    | 182 | 212 | 144 | 134 | 110 | 73 | 127 | 247 |          |
| MLG256 | 1 | -         | -          | -  | 0.000126432 | 182 | 212 | 168 | 132 | 110 | 59 | 121 | 247 |          |
| MLG257 | 1 | -         | -          | -  | 4,03E+00    | 182 | 212 | 168 | 132 | 110 | 63 | 129 | 247 |          |
| MLG258 | 2 | 0.0126642 | 0.237438   | ns | 0.000392604 | 182 | 212 | 168 | 132 | 110 | 65 | 121 | 247 | 15       |
| MLG259 | 1 | -         | -          | -  | 3,71E+00    | 182 | 212 | 168 | 132 | 110 | 65 | 129 | 247 |          |
| MLG260 | 1 | -         | -          | -  | 0.000321026 | 182 | 212 | 168 | 132 | 110 | 71 | 127 | 247 |          |
| MLG261 | 1 | -         | -          | -  | 3,15E-01    | 182 | 212 | 168 | 132 | 110 | 71 | 135 | 247 |          |
| MLG262 | 1 | -         | -          | -  | 8,61E+00    | 182 | 212 | 168 | 132 | 123 | 59 | 119 | 247 |          |
| MLG263 | 1 | -         | -          | -  | 0.000354009 | 182 | 212 | 168 | 132 | 123 | 59 | 121 | 247 |          |
| MLG264 | 1 | -         | -          | -  | 0.000150693 | 182 | 212 | 168 | 132 | 123 | 59 | 125 | 247 |          |
| MLG265 | 1 | -         | -          | -  | 0.000507598 | 182 | 212 | 168 | 132 | 123 | 63 | 125 | 247 |          |
| MLG266 | 1 | -         | -          | -  | 0.00109929  | 182 | 212 | 168 | 132 | 123 | 65 | 121 | 247 |          |
| MLG267 | 2 | 0.0176149 | 0.288411   | ns | 0.000467942 | 182 | 212 | 168 | 132 | 123 | 65 | 125 | 247 | 21, 24   |
| MLG268 | 1 | -         | -          | -  | 5,45E-01    | 182 | 212 | 168 | 132 | 123 | 65 | 129 | 92  |          |
| MLG269 | 1 | -         | -          | -  | 0.000145028 | 182 | 212 | 168 | 132 | 123 | 67 | 119 | 247 |          |
| MLG270 | 1 | -         | -          | -  | 0.000596226 | 182 | 212 | 168 | 132 | 123 | 67 | 121 | 247 |          |
| MLG271 | 2 | 0.093641  | 0.657407   | ns | 0.00119245  | 182 | 212 | 168 | 132 | 123 | 69 | 121 | 247 | 17, 22   |
| MLG272 | 1 | -         | -          | -  | 0.000821825 | 182 | 212 | 168 | 132 | 123 | 69 | 127 | 247 |          |
| MLG273 | 1 | -         | -          | -  | 0.000444148 | 182 | 212 | 168 | 132 | 123 | 73 | 119 | 247 |          |
| MLG274 | 3 | 0.0448998 | 0.464942   | ns | 0.00182594  | 182 | 212 | 168 | 132 | 123 | 73 | 121 | 247 | 6, 8, 16 |
| MLG275 | 1 | -         | -          | -  | 0.00077726  | 182 | 212 | 168 | 132 | 123 | 73 | 125 | 247 |          |
| MLG276 | 1 | -         | -          | -  | 0.000112518 | 182 | 212 | 168 | 134 | 110 | 59 | 121 | 247 |          |
| MLG277 | 1 | -         | -          | -  | 4,79E+00    | 182 | 212 | 168 | 134 | 110 | 59 | 125 | 247 |          |
| MLG278 | 1 | -         | -          | -  | 0.000379009 | 182 | 212 | 168 | 134 | 110 | 63 | 121 | 247 |          |
| MLG279 | 1 | -         | -          | -  | 0.000261209 | 182 | 212 | 168 | 134 | 110 | 63 | 127 | 247 |          |

|        |   |            |           |    |             |     |     |     |     |     |    |     |     |        |
|--------|---|------------|-----------|----|-------------|-----|-----|-----|-----|-----|----|-----|-----|--------|
| MLG280 | 1 | -          | -         | -  | 5,49E+00    | 182 | 212 | 168 | 134 | 110 | 73 | 129 | 247 |        |
| MLG281 | 1 | -          | -         | -  | 0.000731385 | 182 | 212 | 168 | 134 | 123 | 63 | 127 | 247 |        |
| MLG282 | 1 | -          | -         | -  | 1,43E+00    | 182 | 212 | 168 | 134 | 123 | 63 | 131 | 247 |        |
| MLG283 | 1 | -          | -         | -  | 0.000978317 | 182 | 212 | 168 | 134 | 123 | 65 | 121 | 247 |        |
| MLG284 | 1 | -          | -         | -  | 0.00025119  | 182 | 212 | 168 | 134 | 123 | 65 | 123 | 247 |        |
| MLG285 | 1 | -          | -         | -  | 0.000416446 | 182 | 212 | 168 | 134 | 123 | 65 | 125 | 247 |        |
| MLG286 | 1 | -          | -         | -  | 0.00116072  | 182 | 212 | 168 | 134 | 123 | 71 | 121 | 247 |        |
| MLG287 | 1 | -          | -         | -  | 0.000298022 | 182 | 212 | 168 | 134 | 123 | 71 | 123 | 247 |        |
| MLG288 | 1 | -          | -         | -  | 0.000494088 | 182 | 212 | 168 | 134 | 123 | 71 | 125 | 247 |        |
| MLG289 | 1 | -          | -         | -  | 0.000799953 | 182 | 212 | 168 | 134 | 123 | 71 | 127 | 247 |        |
| MLG290 | 2 | 0.154721   | 0.803943  | ns | 0.001625    | 182 | 212 | 168 | 134 | 123 | 73 | 121 | 247 | 6, 12  |
| MLG291 | 1 | -          | -         | -  | 0.00041723  | 182 | 212 | 168 | 134 | 123 | 73 | 123 | 247 |        |
| MLG292 | 1 | -          | -         | -  | 0.00111993  | 182 | 212 | 168 | 134 | 123 | 73 | 127 | 247 |        |
| MLG293 | 1 | -          | -         | -  | 9,95E+00    | 182 | 212 | 168 | 134 | 123 | 75 | 121 | 247 |        |
| MLG294 | 1 | -          | -         | -  | 1,26E+00    | 182 | 212 | 170 | 134 | 110 | 67 | 127 | 247 |        |
| MLG295 | 1 | -          | -         | -  | 3,99E+00    | 182 | 212 | 170 | 134 | 110 | 71 | 121 | 247 |        |
| MLG296 | 1 | -          | -         | -  | 4,35E+00    | 182 | 212 | 170 | 134 | 123 | 63 | 125 | 247 |        |
| MLG297 | 1 | -          | -         | -  | 3,69E-01    | 182 | 212 | 170 | 134 | 123 | 63 | 127 | 92  |        |
| MLG298 | 1 | -          | -         | -  | 0.000131599 | 182 | 212 | 172 | 132 | 123 | 71 | 125 | 247 |        |
| MLG299 | 1 | -          | -         | -  | 8,67E+00    | 182 | 212 | 172 | 134 | 123 | 67 | 127 | 247 |        |
| MLG300 | 1 | -          | -         | -  | 1,76E+00    | 182 | 212 | 172 | 136 | 123 | 71 | 125 | 247 |        |
| MLG301 | 1 | -          | -         | -  | 0.000507896 | 182 | 212 | 174 | 132 | 110 | 63 | 121 | 247 |        |
| MLG302 | 2 | 0.010188   | 0.21585   | ns | 0.000350037 | 182 | 212 | 174 | 132 | 110 | 63 | 127 | 247 | 2, 22  |
| MLG303 | 2 | 0.0176342  | 0.289251  | ns | 0.000468217 | 182 | 212 | 174 | 132 | 110 | 65 | 121 | 247 | 10, 22 |
| MLG304 | 1 | -          | -         | -  | 0.000120218 | 182 | 212 | 174 | 132 | 110 | 65 | 123 | 247 |        |
| MLG305 | 1 | -          | -         | -  | 0.00032269  | 182 | 212 | 174 | 132 | 110 | 65 | 127 | 247 |        |
| MLG306 | 2 | 0.00150446 | 0.0737075 | ns | 0.000130406 | 182 | 212 | 174 | 132 | 110 | 69 | 123 | 247 | 6, 9   |
| MLG307 | 1 | -          | -         | -  | 0.000777716 | 182 | 212 | 174 | 132 | 110 | 73 | 121 | 247 |        |
| MLG308 | 1 | -          | -         | -  | 0.000535994 | 182 | 212 | 174 | 132 | 110 | 73 | 127 | 247 |        |
| MLG309 | 1 | -          | -         | -  | 0.000605358 | 182 | 212 | 174 | 132 | 123 | 63 | 125 | 247 |        |
| MLG310 | 1 | -          | -         | -  | 0.000980103 | 182 | 212 | 174 | 132 | 123 | 63 | 127 | 247 |        |
| MLG311 | 1 | -          | -         | -  | 0.000903532 | 182 | 212 | 174 | 132 | 123 | 65 | 127 | 247 |        |
| MLG312 | 1 | -          | -         | -  | 0.000711055 | 182 | 212 | 174 | 132 | 123 | 67 | 121 | 247 |        |
| MLG313 | 1 | -          | -         | -  | 0.000302679 | 182 | 212 | 174 | 132 | 123 | 67 | 125 | 247 |        |
| MLG314 | 1 | -          | -         | -  | 0.00142211  | 182 | 212 | 174 | 132 | 123 | 69 | 121 | 247 |        |
| MLG315 | 1 | -          | -         | -  | 1,53E+00    | 182 | 212 | 174 | 132 | 123 | 77 | 127 | 247 |        |
| MLG316 | 1 | -          | -         | -  | 0.000134189 | 182 | 212 | 174 | 134 | 110 | 59 | 121 | 247 |        |
| MLG317 | 2 | 0.00107565 | 0.0593023 | ns | 0.000109947 | 182 | 212 | 174 | 134 | 110 | 63 | 119 | 247 | 14, 16 |
| MLG318 | 1 | -          | -         | -  | 0.000192407 | 182 | 212 | 174 | 134 | 110 | 63 | 125 | 247 |        |
| MLG319 | 1 | -          | -         | -  | 0.000177375 | 182 | 212 | 174 | 134 | 110 | 65 | 125 | 247 |        |
| MLG320 | 1 | -          | -         | -  | 0.000452004 | 182 | 212 | 174 | 134 | 110 | 69 | 121 | 247 |        |
| MLG321 | 1 | -          | -         | -  | 0.000340721 | 182 | 212 | 174 | 134 | 110 | 71 | 127 | 247 |        |
| MLG322 | 2 | 0.0362014  | 0.417141  | ns | 0.00069213  | 182 | 212 | 174 | 134 | 110 | 73 | 121 | 247 | 16, 20 |
| MLG323 | 1 | -          | -         | -  | 0.000477009 | 182 | 212 | 174 | 134 | 110 | 73 | 127 | 247 |        |
| MLG324 | 1 | -          | -         | -  | 0.000375728 | 182 | 212 | 174 | 134 | 123 | 59 | 121 | 247 |        |
| MLG325 | 2 | 0.00797441 | 0.187459  | ns | 0.000307851 | 182 | 212 | 174 | 134 | 123 | 63 | 119 | 247 | 7, 14  |
| MLG326 | 1 | -          | -         | -  | 0.000538739 | 182 | 212 | 174 | 134 | 123 | 63 | 125 | 247 |        |

|        |   |           |             |     |             |     |     |     |     |     |    |     |     |               |
|--------|---|-----------|-------------|-----|-------------|-----|-----|-----|-----|-----|----|-----|-----|---------------|
| MLG327 | 1 | -         | -           | -   | 0.000872245 | 182 | 212 | 174 | 134 | 123 | 63 | 127 | 247 |               |
| MLG328 | 1 | -         | -           | -   | 0.000436122 | 182 | 212 | 174 | 134 | 123 | 67 | 127 | 247 |               |
| MLG329 | 1 | -         | -           | -   | 0.00011972  | 182 | 212 | 174 | 134 | 123 | 69 | 129 | 247 |               |
| MLG330 | 1 | -         | -           | -   | 0.00138426  | 182 | 212 | 174 | 134 | 123 | 71 | 121 | 247 |               |
| MLG331 | 1 | -         | -           | -   | 2,29E-02    | 182 | 212 | 174 | 134 | 123 | 71 | 129 | 249 |               |
| MLG332 | 4 | 0.0102482 | 0.217072    | ns  | 0.00193797  | 182 | 212 | 174 | 134 | 123 | 73 | 121 | 247 | 8, 11, 16, 18 |
| MLG333 | 1 | -         | -           | -   | 0.00133562  | 182 | 212 | 174 | 134 | 123 | 73 | 127 | 247 |               |
| MLG334 | 1 | -         | -           | -   | 8,87E+00    | 182 | 212 | 174 | 136 | 123 | 71 | 125 | 247 |               |
| MLG335 | 1 | -         | -           | -   | 0.000194326 | 182 | 212 | 176 | 132 | 123 | 63 | 121 | 247 |               |
| MLG336 | 1 | -         | -           | -   | 6,70E+00    | 182 | 212 | 176 | 132 | 123 | 67 | 127 | 247 |               |
| MLG337 | 1 | -         | -           | -   | 0.000194326 | 182 | 212 | 176 | 132 | 123 | 69 | 121 | 247 |               |
| MLG338 | 1 | -         | -           | -   | 0.000297561 | 182 | 212 | 176 | 132 | 123 | 73 | 121 | 247 |               |
| MLG339 | 1 | -         | -           | -   | 0.000182508 | 182 | 212 | 176 | 134 | 123 | 73 | 127 | 247 |               |
| MLG340 | 1 | -         | -           | -   | 1,03E-01    | 182 | 212 | 176 | 136 | 123 | 71 | 127 | 92  |               |
| MLG341 | 1 | -         | -           | -   | 6,02E+00    | 182 | 212 | 178 | 134 | 123 | 73 | 121 | 247 |               |
| MLG342 | 1 | -         | -           | -   | 1,52E-03    | 182 | 214 | 164 | 134 | 123 | 71 | 125 | 92  |               |
| MLG343 | 1 | -         | -           | -   | 7,89E-01    | 182 | 214 | 168 | 134 | 123 | 75 | 121 | 247 |               |
| MLG344 | 1 | -         | -           | -   | 2,00E+00    | 184 | 212 | 168 | 132 | 123 | 59 | 121 | 247 |               |
| MLG345 | 1 | -         | -           | -   | 6,01E+00    | 184 | 212 | 168 | 134 | 123 | 63 | 121 | 247 |               |
| MLG346 | 1 | -         | -           | -   | 6,34E+00    | 184 | 212 | 168 | 134 | 123 | 73 | 127 | 247 |               |
| MLG347 | 1 | -         | -           | -   | 8,80E+00    | 184 | 212 | 174 | 132 | 123 | 71 | 121 | 247 |               |
| MLG348 | 1 | -         | -           | -   | 1,19E-01    | 184 | 212 | 174 | 134 | 110 | 71 | 125 | 247 |               |
| MLG349 | 1 | -         | -           | -   | 1,04E-02    | 184 | 212 | 174 | 134 | 123 | 73 | 117 | 249 |               |
| MLG350 | 2 | 3,11E-01  | 0.00664858  | **  | 1,85E+00    | 186 | 212 | 168 | 134 | 123 | 65 | 121 | 247 | 7             |
| MLG351 | 1 | -         | -           | -   | 4,41E-03    | 196 | 202 | 168 | 132 | 123 | 73 | 121 | 247 |               |
| MLG352 | 1 | -         | -           | -   | 2,55E+00    | 196 | 212 | 168 | 132 | 110 | 65 | 127 | 247 |               |
| MLG353 | 1 | -         | -           | -   | 4,24E+00    | 196 | 212 | 168 | 132 | 110 | 73 | 127 | 247 |               |
| MLG354 | 1 | -         | -           | -   | 7,75E+00    | 196 | 212 | 168 | 132 | 123 | 63 | 127 | 247 |               |
| MLG355 | 1 | -         | -           | -   | 1,06E+00    | 196 | 212 | 168 | 134 | 110 | 59 | 121 | 247 |               |
| MLG356 | 1 | -         | -           | -   | 3,61E+00    | 196 | 212 | 174 | 132 | 110 | 71 | 127 | 247 |               |
| MLG357 | 1 | -         | -           | -   | 4,62E+00    | 196 | 212 | 174 | 132 | 123 | 67 | 127 | 247 |               |
| MLG358 | 2 | 0.0036552 | 0.122808    | ns  | 0.000205435 | 196 | 212 | 174 | 132 | 123 | 73 | 121 | 247 | 25            |
| MLG359 | 1 | -         | -           | -   | 4,66E+00    | 196 | 212 | 174 | 134 | 110 | 71 | 121 | 247 |               |
| MLG360 | 1 | -         | -           | -   | 6,12E-01    | 198 | 212 | 174 | 132 | 110 | 63 | 125 | 247 |               |
| MLG361 | 2 | 5,08E-03  | 0.000152841 | *** | 7,44E-03    | 198 | 212 | 174 | 132 | 110 | 73 | 156 | 247 | 25            |
| MLG362 | 1 | -         | -           | -   | 3,04E-01    | 200 | 212 | 174 | 132 | 110 | 65 | 127 | 247 |               |
