# Supplementary material
Source: MDPI journal article supplement (https://www.mdpi.com/1424-2818/12/2/44)

**Supplementary Figure S4.** STRUCTURE analysis performed on Balcan/Pannonian populations only, based on admixture model and correlated allele frequencies. Each K is represented by a different color. Populations are indicated below the figure and their geographic origin above.

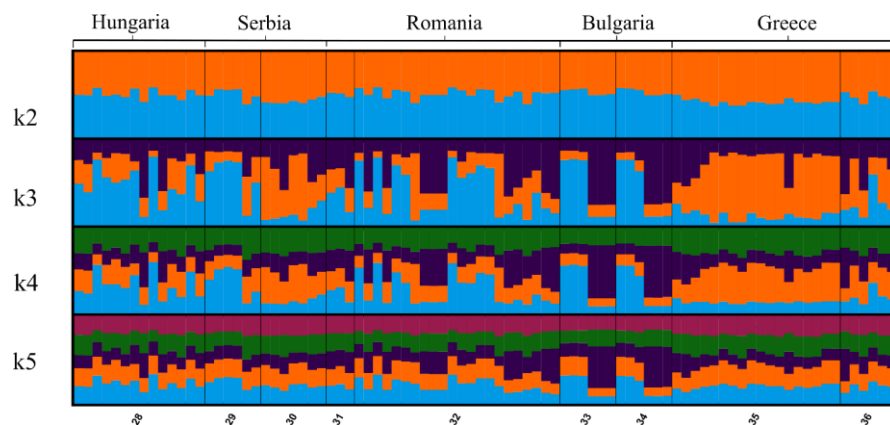

Supplement: s1 [file s1]
