# Supplementary material
Source: MDPI journal article supplement (https://www.mdpi.com/1424-2818/12/2/44)
Supplement: s1 [file s1]

**Supplementary Table S1.** Panels of SSR loci used.

| <b>Panel name</b> | <b>Locus</b> | <b>Primer name and final concentration used (<math>\mu</math>M)</b> | <b>Labelling</b> |
|-------------------|--------------|---------------------------------------------------------------------|------------------|
| Multiplex1        | MA4          | MA4F (3)                                                            | PET              |
|                   |              | MA4R (3)                                                            |                  |
|                   | MA7          | MA7F (5)                                                            | FAM              |
|                   |              | MA7R (5)                                                            |                  |
|                   | MA2-1        | MA21F (5)                                                           | NED              |
|                   |              | MA21R (5)                                                           |                  |
| Multiplex2        | MA5-1        | MA51F (5)                                                           | FAM              |
|                   |              | MA51R (5)                                                           |                  |
|                   | MA14         | MA14F (5)                                                           | FAM              |
|                   |              | MA14R (5)                                                           |                  |
|                   | MA12         | MA12F (5)                                                           | VIC              |
|                   |              | MA12R (5)                                                           |                  |
|                   | MA19         | MA19F (5)                                                           | FAM              |
|                   |              | MA19R (5)                                                           |                  |
|                   | MA13         | MA13F (5)                                                           | VIC              |
|                   |              | MA13R (5)                                                           |                  |
