# Supplementary material
Source: MDPI journal article supplement (https://www.mdpi.com/1424-2818/12/2/44)
Supplement: s1 [file s1]

**Supplementary Figure S2.** Average genotypic diversity in function of the number of loci

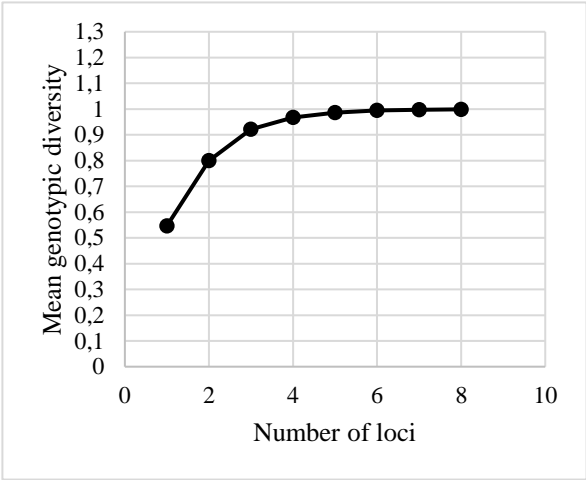

| No. of loci | Mean Genotypic diversity |
|-------------|--------------------------|
| 1           | 0,546711 (0.008)         |
| 2           | 0,799734 (0.005)         |
| 3           | 0,921165 (0.002)         |
| 4           | 0,966854 (0.001)         |
| 5           | 0,986571 (0.0003)        |
| 6           | 0,994223 (0.0001)        |
| 7           | 0,997709 (<0.0001)       |
| 8           | 0,998998 (<0.0001)       |

The standard error is indicated in parentheses.
