# Supplementary material
Source: MDPI journal article supplement (https://www.mdpi.com/1424-2818/12/2/44)
Supplement: s1 [file s1]

**Supplementary Table S3** Polymorphism levels of the 8 SSRs over the entire sample set

| Locus | N             | Na          | Ne          | He          |
|-------|---------------|-------------|-------------|-------------|
| MA4   | 427           | 19          | 3.692       | 0.729       |
| MA7   | 426           | 5           | 1.180       | 0.152       |
| MA14  | 423           | 13          | 3.834       | 0.739       |
| MA12  | 426           | 6           | 2.295       | 0.564       |
| MA19  | 426           | 5           | 1.696       | 0.410       |
| MA51  | 418           | 11          | 6.327       | 0.842       |
| MA21  | 422           | 15          | 4.530       | 0.779       |
| MA13  | 429           | 3           | 1.141       | 0.124       |
| Mean  | 424.63 (1.22) | 9.63 (2.03) | 3.09 (0.65) | 0.54 (0.10) |

N = sample size; Na = No. of Different Alleles; Ne = No. of Effective Alleles;  
He = Expected heterozygosity. The standard error is indicated in parentheses.
