# Supplementary material
Source: MDPI journal article supplement (https://www.mdpi.com/1424-2818/12/2/44)

**Supplementary figure S3.** Estimation of the most probable k. a) Mean log likelihood over 5 runs (error bars = standard deviations) and b)  $\Delta K$ , the second order rate of change in the likelihood, at each K.

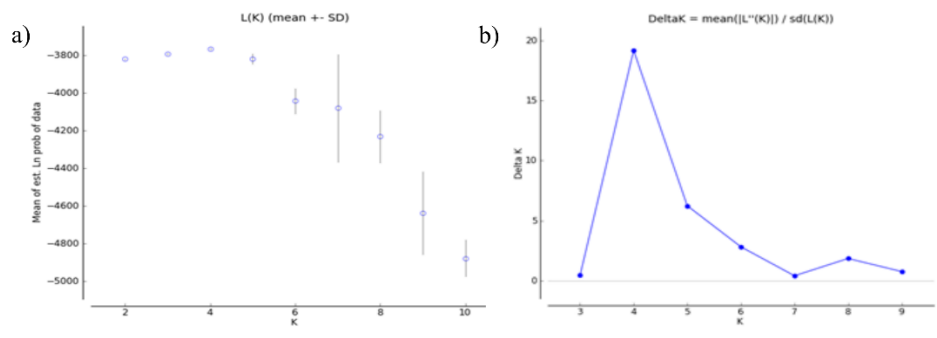

Supplement: s1 [file s1]
