# Supplementary material
Source: MDPI journal article supplement (https://www.mdpi.com/1424-2818/12/2/44)
Supplement: s1 [file s1]

**Supplementary Table S2.** List of the samples genotyped in this study.

| Ind. | Pop. | Locus |     |      |      |      |      |      |        | Long.  | Lat.   |
|------|------|-------|-----|------|------|------|------|------|--------|--------|--------|
|      |      | MA4   | MA7 | MA14 | MA12 | MA19 | MA51 | MA21 | MA13** |        |        |
| 1*   | 1    | 162   | 212 | 142  | 136  | 123  | 71   | 119  | 247    | 16.302 | 39.613 |
| 2*   | 1    | 156   | 212 | 142  | 136  | 123  | 0    | 119  | 247    | 16.302 | 39.613 |
| 3*   | 1    | 156   | 214 | 146  | 136  | 123  | 0    | 123  | 247    | 16.302 | 39.613 |
| 4*   | 2    | 156   | 214 | 0    | 134  | 123  | 71   | 119  | 247    | 16.030 | 40.290 |
| 5*   | 2    | 182   | 212 | 174  | 132  | 110  | 63   | 127  | 247    | 16.030 | 40.290 |
| 6    | 2    | 156   | 214 | 174  | 136  | 123  | 69   | 123  | 92     | 16.030 | 40.290 |
| 7    | 2    | 162   | 214 | 174  | 136  | 123  | 71   | 121  | 247    | 16.030 | 40.290 |
| 8    | 2    | 162   | 214 | 144  | 136  | 123  | 71   | 121  | 92     | 16.030 | 40.290 |
| 9    | 2    | 156   | 214 | 144  | 136  | 123  | 69   | 121  | 92     | 16.030 | 40.290 |
| 10   | 2    | 162   | 214 | 144  | 136  | 123  | 69   | 123  | 92     | 16.030 | 40.290 |
| 11   | 2    | 162   | 214 | 144  | 136  | 123  | 69   | 121  | 92     | 16.030 | 40.290 |
| 12   | 2    | 162   | 214 | 174  | 136  | 123  | 69   | 121  | 92     | 16.030 | 40.290 |
| 13   | 2    | 162   | 214 | 144  | 136  | 123  | 69   | 121  | 92     | 16.030 | 40.290 |
| 14   | 2    | 156   | 214 | 144  | 136  | 123  | 65   | 121  | 92     | 16.030 | 40.290 |
| 15   | 2    | 162   | 214 | 144  | 136  | 123  | 69   | 121  | 92     | 16.030 | 40.290 |
| 16   | 2    | 162   | 214 | 174  | 136  | 123  | 71   | 121  | 92     | 16.030 | 40.290 |
| 17   | 2    | 164   | 214 | 144  | 136  | 123  | 69   | 121  | 92     | 16.030 | 40.290 |
| 18   | 3    | 162   | 212 | 176  | 134  | 123  | 63   | 121  | 247    | 14.836 | 40.987 |
| 19   | 3    | 164   | 212 | 174  | 132  | 123  | 59   | 123  | 247    | 14.836 | 40.987 |
| 20   | 3    | 164   | 214 | 144  | 136  | 123  | 69   | 121  | 247    | 14.836 | 40.987 |
| 21   | 3    | 162   | 212 | 144  | 132  | 123  | 67   | 121  | 247    | 14.836 | 40.987 |
| 22   | 3    | 164   | 214 | 144  | 132  | 123  | 69   | 121  | 247    | 14.836 | 40.987 |
| 23   | 4    | 182   | 212 | 174  | 132  | 123  | 67   | 125  | 247    | 14.506 | 41.498 |
| 24   | 4    | 162   | 212 | 174  | 136  | 123  | 65   | 127  | 247    | 14.506 | 41.498 |
| 25   | 4    | 162   | 212 | 168  | 134  | 123  | 71   | 127  | 247    | 14.506 | 41.498 |
| 26   | 4    | 164   | 212 | 168  | 134  | 123  | 73   | 127  | 92     | 14.506 | 41.498 |
| 27   | 4    | 182   | 212 | 168  | 134  | 110  | 63   | 127  | 247    | 14.506 | 41.498 |
| 28   | 4    | 164   | 214 | 144  | 136  | 123  | 69   | 119  | 247    | 14.506 | 41.498 |
| 29   | 4    | 164   | 212 | 174  | 134  | 123  | 71   | 127  | 247    | 14.506 | 41.498 |
| 30   | 4    | 162   | 214 | 168  | 132  | 123  | 69   | 121  | 247    | 14.506 | 41.498 |
| 31   | 4    | 164   | 212 | 174  | 132  | 110  | 73   | 121  | 247    | 14.506 | 41.498 |
| 32   | 4    | 182   | 212 | 168  | 132  | 123  | 69   | 127  | 247    | 14.506 | 41.498 |
| 33   | 4    | 164   | 214 | 168  | 134  | 123  | 69   | 121  | 92     | 14.506 | 41.498 |
| 34   | 4    | 162   | 214 | 168  | 136  | 123  | 69   | 121  | 92     | 14.506 | 41.498 |
| 35   | 4    | 162   | 214 | 168  | 134  | 123  | 71   | 121  | 247    | 14.506 | 41.498 |
| 36   | 4    | 164   | 214 | 168  | 134  | 123  | 69   | 123  | 92     | 14.506 | 41.498 |
| 37   | 4    | 164   | 214 | 144  | 136  | 123  | 67   | 121  | 247    | 14.506 | 41.498 |
| 38   | 4    | 182   | 212 | 170  | 134  | 123  | 63   | 127  | 92     | 14.506 | 41.498 |
| 39   | 5    | 182   | 212 | 176  | 132  | 123  | 63   | 121  | 247    | 14.374 | 41.809 |
| 40   | 5    | 164   | 212 | 168  | 134  | 123  | 73   | 121  | 247    | 14.374 | 41.809 |
| 41   | 5    | 182   | 212 | 168  | 132  | 123  | 67   | 119  | 247    | 14.374 | 41.809 |
| 42   | 5    | 162   | 212 | 168  | 136  | 123  | 73   | 127  | 247    | 14.374 | 41.809 |
| 43   | 5    | 170   | 212 | 178  | 134  | 123  | 69   | 121  | 247    | 14.374 | 41.809 |
| 44   | 5    | 162   | 212 | 174  | 134  | 123  | 71   | 123  | 247    | 14.374 | 41.809 |
| 45   | 5    | 162   | 212 | 174  | 132  | 123  | 59   | 125  | 247    | 14.374 | 41.809 |

|     |   |     |     |     |     |     |    |     |     |        |        |
|-----|---|-----|-----|-----|-----|-----|----|-----|-----|--------|--------|
| 46  | 5 | 182 | 214 | 168 | 134 | 123 | 75 | 121 | 247 | 14.374 | 41.809 |
| 47  | 5 | 164 | 212 | 178 | 134 | 123 | 69 | 121 | 247 | 14.374 | 41.809 |
| 48  | 5 | 164 | 214 | 168 | 134 | 123 | 71 | 121 | 247 | 14.374 | 41.809 |
| 49  | 6 | 164 | 212 | 168 | 132 | 123 | 73 | 121 | 247 | 14.232 | 41.855 |
| 50  | 6 | 164 | 212 | 168 | 132 | 110 | 69 | 125 | 247 | 14.232 | 41.855 |
| 51  | 6 | 162 | 212 | 174 | 132 | 123 | 65 | 127 | 247 | 14.232 | 41.855 |
| 52  | 6 | 162 | 212 | 168 | 132 | 123 | 71 | 121 | 247 | 14.232 | 41.855 |
| 53  | 6 | 182 | 212 | 178 | 134 | 123 | 73 | 121 | 247 | 14.232 | 41.855 |
| 54  | 6 | 182 | 212 | 168 | 134 | 123 | 73 | 121 | 247 | 14.232 | 41.855 |
| 55  | 6 | 182 | 212 | 168 | 132 | 123 | 73 | 121 | 247 | 14.232 | 41.855 |
| 56  | 6 | 162 | 212 | 174 | 134 | 123 | 67 | 121 | 247 | 14.232 | 41.855 |
| 57  | 6 | 164 | 212 | 168 | 134 | 123 | 71 | 121 | 247 | 14.232 | 41.855 |
| 58  | 6 | 182 | 212 | 174 | 132 | 110 | 69 | 123 | 247 | 14.232 | 41.855 |
| 59  | 6 | 164 | 212 | 176 | 134 | 123 | 73 | 127 | 247 | 14.232 | 41.855 |
| 60  | 6 | 164 | 212 | 168 | 134 | 123 | 69 | 121 | 247 | 14.232 | 41.855 |
| 61  | 6 | 162 | 214 | 174 | 132 | 123 | 73 | 123 | 247 | 14.232 | 41.855 |
| 62  | 6 | 162 | 212 | 176 | 132 | 123 | 73 | 127 | 247 | 14.232 | 41.855 |
| 63  | 6 | 182 | 212 | 176 | 132 | 123 | 69 | 121 | 247 | 14.232 | 41.855 |
| 64  | 6 | 162 | 212 | 168 | 132 | 123 | 73 | 121 | 247 | 14.232 | 41.855 |
| 65  | 7 | 162 | 212 | 174 | 132 | 123 | 71 | 121 | 247 | 14.173 | 41.819 |
| 66  | 7 | 182 | 212 | 168 | 134 | 123 | 71 | 127 | 247 | 14.173 | 41.819 |
| 67  | 7 | 182 | 212 | 176 | 136 | 123 | 71 | 127 | 92  | 14.173 | 41.819 |
| 68  | 7 | 162 | 212 | 168 | 134 | 123 | 73 | 127 | 247 | 14.173 | 41.819 |
| 69  | 7 | 182 | 212 | 168 | 132 | 123 | 59 | 121 | 247 | 14.173 | 41.819 |
| 70  | 7 | 164 | 212 | 168 | 134 | 123 | 73 | 121 | 92  | 14.173 | 41.819 |
| 71  | 7 | 184 | 212 | 168 | 134 | 123 | 63 | 121 | 247 | 14.173 | 41.819 |
| 72  | 7 | 164 | 212 | 144 | 132 | 123 | 65 | 125 | 247 | 14.173 | 41.819 |
| 73  | 7 | 182 | 212 | 144 | 134 | 110 | 73 | 127 | 247 | 14.173 | 41.819 |
| 74  | 7 | 182 | 212 | 168 | 134 | 123 | 71 | 121 | 247 | 14.173 | 41.819 |
| 75  | 7 | 164 | 212 | 168 | 132 | 123 | 69 | 121 | 247 | 14.173 | 41.819 |
| 76  | 7 | 164 | 212 | 174 | 134 | 123 | 71 | 121 | 247 | 14.173 | 41.819 |
| 77  | 7 | 182 | 212 | 174 | 134 | 123 | 63 | 119 | 247 | 14.173 | 41.819 |
| 78  | 7 | 164 | 212 | 168 | 132 | 123 | 73 | 121 | 247 | 14.173 | 41.819 |
| 79  | 7 | 182 | 212 | 168 | 132 | 123 | 65 | 129 | 92  | 14.173 | 41.819 |
| 80  | 7 | 162 | 212 | 168 | 132 | 123 | 71 | 121 | 247 | 14.173 | 41.819 |
| 81  | 7 | 164 | 212 | 168 | 136 | 123 | 69 | 119 | 92  | 14.173 | 41.819 |
| 82  | 7 | 182 | 214 | 164 | 134 | 123 | 71 | 125 | 92  | 14.173 | 41.819 |
| 83* | 7 | 164 | 212 | 172 | 132 | 123 | 0  | 0   | 247 | 14.173 | 41.819 |
| 84* | 7 | 162 | 212 | 148 | 132 | 123 | 70 | 121 | 247 | 14.173 | 41.819 |
| 85* | 7 | 182 | 212 | 174 | 134 | 123 | 67 | 127 | 247 | 14.173 | 41.819 |
| 86* | 7 | 164 | 212 | 168 | 134 | 123 | 63 | 0   | 247 | 14.173 | 41.819 |
| 87* | 7 | 182 | 212 | 172 | 134 | 123 | 67 | 127 | 247 | 14.173 | 41.819 |
| 88* | 7 | 164 | 212 | 168 | 134 | 123 | 73 | 123 | 247 | 14.173 | 41.819 |
| 89* | 7 | 164 | 212 | 172 | 132 | 110 | 71 | 119 | 247 | 14.173 | 41.819 |
| 90* | 7 | 182 | 212 | 174 | 136 | 123 | 71 | 125 | 247 | 14.173 | 41.819 |
| 91* | 7 | 182 | 212 | 172 | 136 | 123 | 71 | 125 | 247 | 14.173 | 41.819 |
| 92* | 7 | 186 | 212 | 168 | 134 | 123 | 65 | 121 | 247 | 14.173 | 41.819 |
| 93* | 7 | 186 | 212 | 168 | 134 | 123 | 65 | 121 | 247 | 14.173 | 41.819 |
| 94* | 7 | 182 | 212 | 170 | 134 | 123 | 63 | 125 | 247 | 14.173 | 41.819 |

|      |    |     |     |     |     |     |    |     |     |        |        |
|------|----|-----|-----|-----|-----|-----|----|-----|-----|--------|--------|
| 95*  | 7  | 164 | 212 | 174 | 134 | 123 | 65 | 125 | 247 | 14.173 | 41.819 |
| 96*  | 7  | 182 | 212 | 170 | 134 | 110 | 71 | 121 | 247 | 14.173 | 41.819 |
| 97*  | 7  | 164 | 210 | 172 | 134 | 123 | 65 | 121 | 247 | 14.173 | 41.819 |
| 98*  | 7  | 164 | 212 | 168 | 134 | 123 | 67 | 121 | 247 | 14.173 | 41.819 |
| 99*  | 7  | 164 | 212 | 148 | 134 | 123 | 65 | 119 | 247 | 14.173 | 41.819 |
| 100* | 7  | 162 | 212 | 148 | 132 | 123 | 65 | 121 | 247 | 14.173 | 41.819 |
| 101  | 8  | 164 | 212 | 168 | 134 | 123 | 73 | 121 | 247 | 14.640 | 41.866 |
| 102  | 8  | 182 | 212 | 168 | 132 | 123 | 73 | 121 | 247 | 14.640 | 41.866 |
| 103  | 8  | 182 | 212 | 174 | 134 | 123 | 73 | 121 | 247 | 14.640 | 41.866 |
| 104  | 8  | 162 | 212 | 168 | 132 | 123 | 73 | 121 | 247 | 14.640 | 41.866 |
| 105  | 8  | 166 | 212 | 174 | 134 | 123 | 73 | 121 | 247 | 14.640 | 41.866 |
| 106  | 8  | 182 | 212 | 168 | 134 | 110 | 73 | 129 | 247 | 14.640 | 41.866 |
| 107  | 8  | 182 | 212 | 174 | 132 | 110 | 65 | 127 | 247 | 14.640 | 41.866 |
| 108  | 8  | 164 | 212 | 144 | 132 | 123 | 71 | 121 | 247 | 14.640 | 41.866 |
| 109  | 8  | 162 | 212 | 176 | 132 | 123 | 63 | 121 | 247 | 14.640 | 41.866 |
| 110  | 8  | 164 | 214 | 168 | 132 | 123 | 67 | 121 | 247 | 14.640 | 41.866 |
| 111  | 9  | 182 | 212 | 176 | 132 | 123 | 67 | 127 | 247 | 14.344 | 41.892 |
| 112  | 9  | 162 | 212 | 168 | 132 | 123 | 67 | 127 | 247 | 14.344 | 41.892 |
| 113  | 9  | 162 | 212 | 174 | 132 | 123 | 69 | 123 | 247 | 14.344 | 41.892 |
| 114  | 9  | 166 | 212 | 174 | 132 | 123 | 73 | 127 | 247 | 14.344 | 41.892 |
| 115  | 9  | 182 | 212 | 174 | 132 | 110 | 69 | 123 | 247 | 14.344 | 41.892 |
| 116  | 9  | 148 | 212 | 168 | 134 | 123 | 73 | 121 | 247 | 14.344 | 41.892 |
| 117  | 9  | 182 | 212 | 168 | 134 | 123 | 73 | 123 | 247 | 14.344 | 41.892 |
| 118  | 9  | 164 | 212 | 168 | 132 | 123 | 73 | 121 | 247 | 14.344 | 41.892 |
| 119  | 9  | 182 | 212 | 176 | 132 | 123 | 73 | 121 | 247 | 14.344 | 41.892 |
| 120  | 9  | 164 | 212 | 168 | 134 | 123 | 69 | 121 | 247 | 14.344 | 41.892 |
| 121  | 9  | 162 | 212 | 174 | 132 | 110 | 65 | 125 | 247 | 14.344 | 41.892 |
| 122  | 9  | 162 | 212 | 176 | 134 | 110 | 71 | 121 | 247 | 14.344 | 41.892 |
| 123  | 9  | 164 | 212 | 168 | 134 | 123 | 73 | 127 | 247 | 14.344 | 41.892 |
| 124  | 9  | 162 | 212 | 168 | 134 | 123 | 73 | 127 | 247 | 14.344 | 41.892 |
| 125  | 10 | 182 | 212 | 174 | 132 | 110 | 65 | 121 | 247 | 13.390 | 41.930 |
| 126  | 10 | 162 | 212 | 174 | 134 | 110 | 71 | 127 | 247 | 13.390 | 41.930 |
| 127  | 10 | 162 | 212 | 174 | 134 | 110 | 67 | 127 | 247 | 13.390 | 41.930 |
| 128  | 10 | 182 | 212 | 174 | 134 | 110 | 65 | 125 | 247 | 13.390 | 41.930 |
| 129  | 10 | 162 | 212 | 174 | 132 | 110 | 65 | 127 | 247 | 13.390 | 41.930 |
| 130  | 10 | 182 | 212 | 168 | 134 | 123 | 63 | 131 | 247 | 13.390 | 41.930 |
| 131  | 10 | 182 | 212 | 174 | 134 | 110 | 71 | 127 | 247 | 13.390 | 41.930 |
| 132  | 11 | 162 | 212 | 168 | 132 | 123 | 69 | 127 | 247 | 14.113 | 42.350 |
| 133  | 11 | 162 | 212 | 176 | 132 | 123 | 65 | 127 | 247 | 14.113 | 42.350 |
| 134  | 11 | 182 | 212 | 168 | 132 | 123 | 65 | 121 | 247 | 14.113 | 42.350 |
| 135  | 11 | 148 | 212 | 174 | 132 | 123 | 63 | 125 | 247 | 14.113 | 42.350 |
| 136  | 11 | 182 | 212 | 174 | 134 | 123 | 73 | 121 | 247 | 14.113 | 42.350 |
| 137  | 12 | 164 | 212 | 168 | 132 | 123 | 65 | 123 | 247 | 13.575 | 42.854 |
| 138  | 12 | 182 | 212 | 168 | 134 | 123 | 65 | 123 | 247 | 13.575 | 42.854 |
| 139  | 12 | 164 | 212 | 168 | 134 | 125 | 67 | 119 | 247 | 13.575 | 42.854 |
| 140  | 12 | 162 | 212 | 168 | 134 | 123 | 73 | 127 | 247 | 13.575 | 42.854 |
| 141  | 12 | 164 | 212 | 168 | 134 | 123 | 65 | 127 | 247 | 13.575 | 42.854 |
| 142  | 12 | 164 | 212 | 174 | 134 | 110 | 73 | 121 | 247 | 13.575 | 42.854 |
| 143  | 12 | 182 | 212 | 168 | 134 | 123 | 71 | 125 | 247 | 13.575 | 42.854 |

|     |    |     |     |     |     |     |    |     |     |        |        |
|-----|----|-----|-----|-----|-----|-----|----|-----|-----|--------|--------|
| 144 | 12 | 164 | 212 | 168 | 132 | 123 | 63 | 123 | 247 | 13.575 | 42.854 |
| 145 | 12 | 182 | 212 | 168 | 134 | 123 | 73 | 121 | 247 | 13.575 | 42.854 |
| 146 | 12 | 182 | 212 | 168 | 134 | 123 | 65 | 125 | 247 | 13.575 | 42.854 |
| 147 | 13 | 164 | 212 | 168 | 134 | 123 | 73 | 125 | 247 | 12.690 | 42.580 |
| 148 | 13 | 182 | 212 | 168 | 134 | 123 | 73 | 127 | 247 | 12.690 | 42.580 |
| 149 | 13 | 164 | 212 | 174 | 134 | 123 | 69 | 129 | 247 | 12.690 | 42.580 |
| 150 | 13 | 182 | 212 | 168 | 134 | 123 | 71 | 123 | 247 | 12.690 | 42.580 |
| 151 | 13 | 166 | 212 | 168 | 134 | 110 | 71 | 127 | 247 | 12.690 | 42.580 |
| 152 | 13 | 164 | 212 | 172 | 132 | 110 | 71 | 127 | 247 | 12.690 | 42.580 |
| 153 | 13 | 164 | 212 | 172 | 134 | 110 | 71 | 121 | 247 | 12.690 | 42.580 |
| 154 | 13 | 164 | 212 | 168 | 134 | 123 | 71 | 105 | 247 | 12.690 | 42.580 |
| 155 | 13 | 166 | 212 | 174 | 132 | 123 | 65 | 121 | 247 | 12.690 | 42.580 |
| 156 | 14 | 164 | 212 | 174 | 134 | 123 | 73 | 127 | 247 | 12.020 | 42.870 |
| 157 | 14 | 164 | 212 | 174 | 134 | 123 | 63 | 127 | 249 | 12.020 | 42.870 |
| 158 | 14 | 164 | 212 | 168 | 132 | 123 | 59 | 129 | 247 | 12.020 | 42.870 |
| 159 | 14 | 182 | 212 | 174 | 134 | 110 | 63 | 119 | 247 | 12.020 | 42.870 |
| 160 | 14 | 182 | 212 | 174 | 134 | 123 | 63 | 119 | 247 | 12.020 | 42.870 |
| 161 | 14 | 164 | 214 | 174 | 134 | 110 | 73 | 127 | 247 | 12.020 | 42.870 |
| 162 | 14 | 164 | 212 | 174 | 134 | 123 | 73 | 119 | 247 | 12.020 | 42.870 |
| 163 | 14 | 164 | 212 | 174 | 134 | 110 | 73 | 125 | 247 | 12.020 | 42.870 |
| 164 | 14 | 164 | 212 | 168 | 134 | 110 | 69 | 125 | 247 | 12.020 | 42.870 |
| 165 | 14 | 182 | 212 | 174 | 134 | 123 | 63 | 125 | 247 | 12.020 | 42.870 |
| 166 | 14 | 164 | 212 | 176 | 132 | 123 | 63 | 123 | 247 | 12.020 | 42.870 |
| 167 | 15 | 182 | 212 | 168 | 134 | 123 | 63 | 127 | 247 | 12.530 | 43.380 |
| 168 | 15 | 182 | 212 | 168 | 132 | 123 | 59 | 119 | 247 | 12.530 | 43.380 |
| 169 | 15 | 182 | 212 | 174 | 134 | 110 | 69 | 121 | 247 | 12.530 | 43.380 |
| 170 | 15 | 164 | 212 | 168 | 132 | 110 | 71 | 123 | 247 | 12.530 | 43.380 |
| 171 | 15 | 182 | 212 | 174 | 134 | 123 | 63 | 127 | 247 | 12.530 | 43.380 |
| 172 | 15 | 182 | 212 | 168 | 132 | 110 | 65 | 121 | 247 | 12.530 | 43.380 |
| 173 | 15 | 182 | 212 | 168 | 134 | 110 | 59 | 121 | 247 | 12.530 | 43.380 |
| 174 | 15 | 182 | 212 | 168 | 132 | 110 | 59 | 121 | 247 | 12.530 | 43.380 |
| 175 | 15 | 182 | 212 | 168 | 132 | 110 | 65 | 121 | 247 | 12.530 | 43.380 |
| 176 | 16 | 182 | 212 | 174 | 134 | 123 | 59 | 121 | 247 | 12.575 | 43.351 |
| 177 | 16 | 164 | 212 | 174 | 134 | 110 | 73 | 119 | 247 | 12.575 | 43.351 |
| 178 | 16 | 164 | 212 | 174 | 134 | 110 | 73 | 119 | 247 | 12.575 | 43.351 |
| 179 | 16 | 164 | 212 | 176 | 134 | 123 | 63 | 121 | 247 | 12.575 | 43.351 |
| 180 | 16 | 182 | 212 | 174 | 134 | 123 | 73 | 121 | 247 | 12.575 | 43.351 |
| 181 | 16 | 164 | 212 | 162 | 134 | 123 | 65 | 121 | 247 | 12.575 | 43.351 |
| 182 | 16 | 164 | 212 | 174 | 134 | 110 | 73 | 119 | 247 | 12.575 | 43.351 |
| 183 | 16 | 182 | 212 | 168 | 132 | 123 | 73 | 119 | 247 | 12.575 | 43.351 |
| 184 | 16 | 182 | 212 | 174 | 134 | 110 | 59 | 121 | 247 | 12.575 | 43.351 |
| 185 | 16 | 182 | 212 | 168 | 132 | 123 | 73 | 121 | 247 | 12.575 | 43.351 |
| 186 | 16 | 182 | 212 | 168 | 132 | 110 | 71 | 135 | 247 | 12.575 | 43.351 |
| 187 | 16 | 182 | 212 | 174 | 132 | 110 | 63 | 121 | 247 | 12.575 | 43.351 |
| 188 | 16 | 164 | 212 | 168 | 134 | 123 | 73 | 127 | 247 | 12.575 | 43.351 |
| 189 | 16 | 182 | 212 | 174 | 134 | 110 | 73 | 121 | 247 | 12.575 | 43.351 |
| 190 | 16 | 164 | 212 | 172 | 132 | 110 | 67 | 121 | 247 | 12.575 | 43.351 |
| 191 | 16 | 182 | 212 | 174 | 134 | 110 | 63 | 119 | 247 | 12.575 | 43.351 |
| 192 | 16 | 182 | 212 | 174 | 132 | 110 | 73 | 121 | 247 | 12.575 | 43.351 |

|     |    |     |     |     |     |     |    |     |     |        |        |
|-----|----|-----|-----|-----|-----|-----|----|-----|-----|--------|--------|
| 193 | 16 | 166 | 212 | 168 | 134 | 123 | 63 | 127 | 247 | 12.575 | 43.351 |
| 194 | 16 | 164 | 212 | 174 | 134 | 110 | 73 | 119 | 247 | 12.575 | 43.351 |
| 195 | 16 | 164 | 212 | 174 | 134 | 110 | 59 | 121 | 247 | 12.575 | 43.351 |
| 196 | 16 | 156 | 214 | 144 | 134 | 123 | 69 | 121 | 247 | 12.575 | 43.351 |
| 197 | 16 | 182 | 212 | 168 | 134 | 110 | 59 | 125 | 247 | 12.575 | 43.351 |
| 198 | 16 | 164 | 212 | 174 | 134 | 123 | 59 | 121 | 247 | 12.575 | 43.351 |
| 199 | 16 | 182 | 212 | 174 | 132 | 123 | 63 | 127 | 247 | 12.575 | 43.351 |
| 200 | 16 | 164 | 216 | 174 | 134 | 123 | 67 | 121 | 247 | 12.575 | 43.351 |
| 201 | 17 | 182 | 212 | 168 | 132 | 110 | 71 | 127 | 247 | 12.240 | 43.464 |
| 202 | 17 | 164 | 212 | 174 | 132 | 123 | 67 | 121 | 247 | 12.240 | 43.464 |
| 203 | 17 | 182 | 212 | 174 | 132 | 123 | 65 | 127 | 247 | 12.240 | 43.464 |
| 204 | 17 | 166 | 212 | 176 | 132 | 123 | 65 | 125 | 247 | 12.240 | 43.464 |
| 205 | 17 | 182 | 212 | 174 | 134 | 123 | 69 | 129 | 247 | 12.240 | 43.464 |
| 206 | 17 | 164 | 212 | 174 | 132 | 123 | 75 | 121 | 247 | 12.240 | 43.464 |
| 207 | 17 | 182 | 212 | 168 | 132 | 123 | 69 | 121 | 247 | 12.240 | 43.464 |
| 208 | 17 | 164 | 212 | 174 | 134 | 123 | 73 | 121 | 247 | 12.240 | 43.464 |
| 209 | 17 | 182 | 212 | 174 | 132 | 123 | 69 | 121 | 247 | 12.240 | 43.464 |
| 210 | 17 | 164 | 212 | 168 | 134 | 123 | 71 | 121 | 247 | 12.240 | 43.464 |
| 211 | 17 | 164 | 212 | 168 | 132 | 123 | 71 | 121 | 247 | 12.240 | 43.464 |
| 212 | 17 | 164 | 212 | 168 | 132 | 110 | 63 | 121 | 247 | 12.240 | 43.464 |
| 213 | 18 | 164 | 212 | 168 | 134 | 123 | 73 | 127 | 247 | 12.370 | 43.487 |
| 214 | 18 | 164 | 212 | 174 | 134 | 123 | 69 | 121 | 247 | 12.370 | 43.487 |
| 215 | 18 | 164 | 212 | 168 | 134 | 123 | 73 | 121 | 247 | 12.370 | 43.487 |
| 216 | 18 | 164 | 212 | 174 | 134 | 123 | 73 | 127 | 247 | 12.370 | 43.487 |
| 217 | 18 | 182 | 212 | 174 | 134 | 123 | 73 | 121 | 247 | 12.370 | 43.487 |
| 218 | 18 | 164 | 212 | 168 | 134 | 123 | 71 | 127 | 247 | 12.370 | 43.487 |
| 219 | 18 | 164 | 212 | 174 | 134 | 123 | 73 | 119 | 247 | 12.370 | 43.487 |
| 220 | 18 | 164 | 212 | 174 | 134 | 123 | 65 | 121 | 247 | 12.370 | 43.487 |
| 221 | 18 | 164 | 212 | 174 | 134 | 123 | 69 | 119 | 247 | 12.370 | 43.487 |
| 222 | 18 | 164 | 212 | 168 | 134 | 123 | 63 | 121 | 247 | 12.370 | 43.487 |
| 223 | 18 | 164 | 212 | 168 | 132 | 123 | 63 | 125 | 247 | 12.370 | 43.487 |
| 224 | 18 | 182 | 212 | 168 | 134 | 123 | 65 | 121 | 247 | 12.370 | 43.487 |
| 225 | 19 | 164 | 212 | 174 | 134 | 123 | 71 | 121 | 247 | 12.451 | 43.445 |
| 226 | 19 | 164 | 212 | 162 | 132 | 123 | 71 | 125 | 247 | 12.451 | 43.445 |
| 227 | 19 | 164 | 212 | 176 | 132 | 123 | 63 | 121 | 247 | 12.451 | 43.445 |
| 228 | 19 | 156 | 212 | 178 | 134 | 123 | 63 | 127 | 247 | 12.451 | 43.445 |
| 229 | 19 | 164 | 212 | 174 | 132 | 123 | 69 | 127 | 247 | 12.451 | 43.445 |
| 230 | 19 | 164 | 212 | 174 | 132 | 123 | 71 | 127 | 247 | 12.451 | 43.445 |
| 231 | 19 | 164 | 212 | 174 | 132 | 110 | 69 | 129 | 247 | 12.451 | 43.445 |
| 232 | 20 | 182 | 212 | 174 | 134 | 123 | 73 | 127 | 247 | 10.860 | 43.650 |
| 233 | 20 | 164 | 212 | 176 | 134 | 123 | 69 | 121 | 247 | 10.860 | 43.650 |
| 234 | 20 | 156 | 212 | 168 | 134 | 123 | 73 | 123 | 247 | 10.860 | 43.650 |
| 235 | 20 | 182 | 212 | 174 | 132 | 110 | 73 | 127 | 247 | 10.860 | 43.650 |
| 236 | 20 | 164 | 212 | 176 | 134 | 110 | 73 | 121 | 247 | 10.860 | 43.650 |
| 237 | 20 | 152 | 212 | 174 | 132 | 123 | 73 | 121 | 247 | 10.860 | 43.650 |
| 238 | 20 | 164 | 212 | 174 | 134 | 110 | 73 | 121 | 247 | 10.860 | 43.650 |
| 239 | 20 | 164 | 212 | 168 | 132 | 123 | 73 | 121 | 247 | 10.860 | 43.650 |
| 240 | 20 | 152 | 212 | 174 | 134 | 123 | 73 | 127 | 247 | 10.860 | 43.650 |
| 241 | 20 | 152 | 212 | 174 | 134 | 123 | 65 | 127 | 247 | 10.860 | 43.650 |

|     |    |     |     |     |     |     |    |     |     |        |        |
|-----|----|-----|-----|-----|-----|-----|----|-----|-----|--------|--------|
| 242 | 20 | 182 | 212 | 174 | 134 | 110 | 73 | 121 | 247 | 10.860 | 43.650 |
| 243 | 20 | 164 | 212 | 172 | 134 | 123 | 73 | 123 | 247 | 10.860 | 43.650 |
| 244 | 20 | 184 | 212 | 174 | 134 | 123 | 73 | 117 | 249 | 10.860 | 43.650 |
| 245 | 20 | 164 | 212 | 174 | 132 | 123 | 73 | 127 | 247 | 10.860 | 43.650 |
| 246 | 20 | 164 | 212 | 168 | 132 | 110 | 71 | 123 | 247 | 10.860 | 43.650 |
| 247 | 20 | 164 | 212 | 174 | 134 | 123 | 63 | 121 | 249 | 10.860 | 43.650 |
| 248 | 20 | 150 | 212 | 174 | 132 | 123 | 73 | 119 | 247 | 10.860 | 43.650 |
| 249 | 20 | 164 | 212 | 168 | 134 | 123 | 73 | 121 | 247 | 10.860 | 43.650 |
| 250 | 20 | 164 | 212 | 174 | 134 | 123 | 71 | 117 | 249 | 10.860 | 43.650 |
| 251 | 20 | 182 | 212 | 174 | 134 | 123 | 71 | 129 | 249 | 10.860 | 43.650 |
| 252 | 20 | 164 | 212 | 174 | 134 | 123 | 71 | 121 | 247 | 10.860 | 43.650 |
| 253 | 20 | 164 | 212 | 174 | 134 | 123 | 63 | 129 | 249 | 10.860 | 43.650 |
| 254 | 20 | 164 | 212 | 168 | 134 | 123 | 71 | 127 | 247 | 10.860 | 43.650 |
| 255 | 20 | 184 | 212 | 174 | 132 | 123 | 71 | 121 | 247 | 10.860 | 43.650 |
| 256 | 20 | 156 | 212 | 174 | 132 | 110 | 73 | 121 | 247 | 10.860 | 43.650 |
| 257 | 20 | 164 | 212 | 168 | 134 | 123 | 71 | 121 | 247 | 10.860 | 43.650 |
| 258 | 20 | 164 | 214 | 176 | 134 | 123 | 71 | 123 | 249 | 10.860 | 43.650 |
| 259 | 20 | 164 | 212 | 172 | 134 | 110 | 63 | 123 | 247 | 10.860 | 43.650 |
| 260 | 20 | 164 | 212 | 174 | 134 | 123 | 73 | 125 | 247 | 10.860 | 43.650 |
| 261 | 20 | 146 | 212 | 168 | 134 | 123 | 65 | 117 | 247 | 10.860 | 43.650 |
| 262 | 20 | 164 | 212 | 168 | 134 | 123 | 67 | 121 | 247 | 10.860 | 43.650 |
| 263 | 20 | 196 | 212 | 174 | 134 | 110 | 71 | 121 | 247 | 10.860 | 43.650 |
| 264 | 21 | 184 | 212 | 174 | 134 | 110 | 71 | 125 | 247 | 11.340 | 44.360 |
| 265 | 21 | 182 | 212 | 174 | 132 | 123 | 77 | 127 | 247 | 11.340 | 44.360 |
| 266 | 21 | 182 | 212 | 168 | 134 | 110 | 63 | 121 | 247 | 11.340 | 44.360 |
| 267 | 21 | 182 | 212 | 174 | 134 | 110 | 73 | 127 | 247 | 11.340 | 44.360 |
| 268 | 21 | 182 | 212 | 170 | 134 | 110 | 67 | 127 | 247 | 11.340 | 44.360 |
| 269 | 21 | 182 | 210 | 168 | 132 | 110 | 73 | 125 | 247 | 11.340 | 44.360 |
| 270 | 21 | 182 | 212 | 168 | 132 | 123 | 73 | 125 | 247 | 11.340 | 44.360 |
| 271 | 21 | 182 | 212 | 168 | 132 | 123 | 65 | 125 | 247 | 11.340 | 44.360 |
| 272 | 21 | 182 | 212 | 174 | 132 | 110 | 65 | 123 | 247 | 11.340 | 44.360 |
| 273 | 21 | 182 | 212 | 176 | 134 | 123 | 73 | 127 | 247 | 11.340 | 44.360 |
| 274 | 22 | 156 | 212 | 174 | 132 | 123 | 73 | 121 | 247 | 11.340 | 44.390 |
| 275 | 22 | 182 | 212 | 174 | 132 | 110 | 63 | 127 | 247 | 11.340 | 44.390 |
| 276 | 22 | 164 | 212 | 174 | 132 | 123 | 65 | 129 | 247 | 11.340 | 44.390 |
| 277 | 22 | 182 | 212 | 142 | 132 | 110 | 73 | 127 | 247 | 11.340 | 44.390 |
| 278 | 22 | 172 | 212 | 142 | 132 | 110 | 67 | 121 | 247 | 11.340 | 44.390 |
| 279 | 22 | 182 | 212 | 168 | 132 | 123 | 67 | 121 | 247 | 11.340 | 44.390 |
| 280 | 22 | 182 | 212 | 174 | 132 | 110 | 65 | 121 | 247 | 11.340 | 44.390 |
| 281 | 22 | 182 | 212 | 168 | 132 | 110 | 65 | 129 | 247 | 11.340 | 44.390 |
| 282 | 22 | 182 | 212 | 168 | 132 | 123 | 69 | 121 | 247 | 11.340 | 44.390 |
| 283 | 23 | 164 | 212 | 168 | 132 | 110 | 69 | 156 | 247 | 8.030  | 44.750 |
| 284 | 23 | 158 | 212 | 168 | 132 | 123 | 63 | 127 | 247 | 8.030  | 44.750 |
| 285 | 23 | 164 | 212 | 174 | 134 | 110 | 59 | 127 | 247 | 8.030  | 44.750 |
| 286 | 23 | 196 | 212 | 174 | 132 | 110 | 71 | 127 | 247 | 8.030  | 44.750 |
| 287 | 23 | 196 | 212 | 168 | 132 | 110 | 73 | 127 | 247 | 8.030  | 44.750 |
| 288 | 23 | 196 | 202 | 168 | 132 | 123 | 73 | 121 | 247 | 8.030  | 44.750 |
| 289 | 23 | 182 | 212 | 168 | 132 | 110 | 63 | 129 | 247 | 8.030  | 44.750 |
| 290 | 24 | 164 | 212 | 144 | 132 | 123 | 63 | 125 | 247 | 8.640  | 44.640 |

|     |    |     |     |     |     |     |    |     |     |        |        |
|-----|----|-----|-----|-----|-----|-----|----|-----|-----|--------|--------|
| 291 | 24 | 196 | 212 | 168 | 132 | 123 | 63 | 127 | 247 | 8.640  | 44.640 |
| 292 | 24 | 196 | 212 | 168 | 132 | 110 | 65 | 127 | 247 | 8.640  | 44.640 |
| 293 | 24 | 196 | 212 | 168 | 134 | 110 | 59 | 121 | 247 | 8.640  | 44.640 |
| 294 | 24 | 196 | 212 | 174 | 132 | 123 | 67 | 127 | 247 | 8.640  | 44.640 |
| 295 | 24 | 200 | 212 | 174 | 132 | 110 | 65 | 127 | 247 | 8.640  | 44.640 |
| 296 | 24 | 182 | 212 | 174 | 132 | 123 | 67 | 121 | 247 | 8.640  | 44.640 |
| 297 | 24 | 164 | 212 | 174 | 132 | 123 | 65 | 127 | 247 | 8.640  | 44.640 |
| 298 | 24 | 182 | 212 | 168 | 132 | 123 | 65 | 125 | 247 | 8.640  | 44.640 |
| 299 | 25 | 196 | 212 | 174 | 132 | 123 | 73 | 121 | 247 | 8.050  | 44.460 |
| 300 | 25 | 164 | 212 | 174 | 134 | 110 | 73 | 156 | 247 | 8.050  | 44.460 |
| 301 | 25 | 196 | 212 | 174 | 132 | 123 | 73 | 121 | 247 | 8.050  | 44.460 |
| 302 | 25 | 164 | 212 | 168 | 132 | 110 | 59 | 125 | 247 | 8.050  | 44.460 |
| 303 | 25 | 178 | 212 | 174 | 134 | 123 | 63 | 125 | 247 | 8.050  | 44.460 |
| 304 | 25 | 198 | 212 | 174 | 132 | 110 | 63 | 125 | 247 | 8.050  | 44.460 |
| 305 | 25 | 178 | 212 | 174 | 134 | 123 | 63 | 125 | 247 | 8.050  | 44.460 |
| 306 | 25 | 164 | 212 | 174 | 132 | 110 | 65 | 156 | 247 | 8.050  | 44.460 |
| 307 | 25 | 164 | 212 | 168 | 134 | 123 | 63 | 127 | 247 | 8.050  | 44.460 |
| 308 | 25 | 164 | 212 | 174 | 132 | 110 | 65 | 158 | 247 | 8.050  | 44.460 |
| 309 | 25 | 164 | 212 | 168 | 134 | 110 | 59 | 154 | 247 | 8.050  | 44.460 |
| 310 | 25 | 198 | 212 | 174 | 132 | 110 | 73 | 156 | 247 | 8.050  | 44.460 |
| 311 | 25 | 164 | 212 | 174 | 132 | 110 | 73 | 127 | 247 | 8.050  | 44.460 |
| 312 | 25 | 164 | 212 | 174 | 132 | 110 | 71 | 131 | 247 | 8.050  | 44.460 |
| 313 | 25 | 198 | 212 | 174 | 132 | 110 | 73 | 156 | 247 | 8.050  | 44.460 |
| 314 | 26 | 164 | 212 | 174 | 132 | 123 | 63 | 127 | 247 | 8.961  | 45.298 |
| 315 | 26 | 164 | 212 | 168 | 132 | 110 | 63 | 127 | 247 | 8.961  | 45.298 |
| 316 | 26 | 182 | 212 | 168 | 132 | 123 | 59 | 125 | 247 | 8.961  | 45.298 |
| 317 | 26 | 164 | 212 | 174 | 132 | 123 | 73 | 125 | 247 | 8.961  | 45.298 |
| 318 | 26 | 164 | 212 | 168 | 132 | 123 | 63 | 123 | 247 | 8.961  | 45.298 |
| 319 | 26 | 182 | 212 | 168 | 132 | 123 | 63 | 125 | 247 | 8.961  | 45.298 |
| 320 | 26 | 164 | 212 | 174 | 132 | 110 | 65 | 121 | 247 | 8.961  | 45.298 |
| 321 | 26 | 164 | 212 | 174 | 134 | 110 | 63 | 125 | 247 | 8.961  | 45.298 |
| 322 | 26 | 164 | 212 | 168 | 132 | 123 | 65 | 123 | 247 | 8.961  | 45.298 |
| 323 | 26 | 164 | 212 | 174 | 132 | 123 | 73 | 121 | 247 | 8.961  | 45.298 |
| 324 | 26 | 184 | 212 | 168 | 132 | 123 | 59 | 121 | 247 | 8.961  | 45.298 |
| 325 | 27 | 164 | 212 | 168 | 134 | 123 | 73 | 127 | 247 | 13.600 | 45.320 |
| 326 | 27 | 164 | 212 | 174 | 134 | 110 | 71 | 129 | 247 | 13.600 | 45.320 |
| 327 | 27 | 184 | 212 | 168 | 134 | 123 | 73 | 127 | 247 | 13.600 | 45.320 |
| 328 | 27 | 164 | 212 | 174 | 132 | 123 | 63 | 127 | 247 | 13.600 | 45.320 |
| 329 | 27 | 164 | 212 | 172 | 134 | 110 | 75 | 125 | 247 | 13.600 | 45.320 |
| 330 | 27 | 164 | 212 | 174 | 132 | 110 | 71 | 127 | 247 | 13.600 | 45.320 |
| 331 | 27 | 164 | 212 | 174 | 134 | 110 | 73 | 127 | 247 | 13.600 | 45.320 |
| 332 | 27 | 164 | 212 | 168 | 134 | 123 | 59 | 127 | 247 | 13.600 | 45.320 |
| 333 | 27 | 164 | 212 | 174 | 134 | 123 | 75 | 127 | 247 | 13.600 | 45.320 |
| 334 | 27 | 164 | 212 | 174 | 134 | 123 | 73 | 127 | 247 | 13.600 | 45.320 |
| 335 | 27 | 182 | 212 | 174 | 132 | 123 | 63 | 125 | 247 | 13.600 | 45.320 |
| 336 | 27 | 182 | 212 | 174 | 134 | 110 | 63 | 125 | 247 | 13.600 | 45.320 |
| 337 | 27 | 180 | 212 | 174 | 134 | 110 | 63 | 127 | 247 | 13.600 | 45.320 |
| 338 | 27 | 182 | 212 | 174 | 134 | 123 | 71 | 121 | 247 | 13.600 | 45.320 |
| 339 | 27 | 164 | 212 | 174 | 130 | 123 | 65 | 121 | 247 | 13.600 | 45.320 |

|      |    |     |     |     |     |     |    |     |     |        |        |
|------|----|-----|-----|-----|-----|-----|----|-----|-----|--------|--------|
| 340  | 27 | 182 | 212 | 168 | 134 | 123 | 75 | 121 | 247 | 13.600 | 45.320 |
| 341  | 27 | 164 | 212 | 174 | 134 | 110 | 73 | 125 | 247 | 13.600 | 45.320 |
| 342* | 28 | 164 | 212 | 166 | 132 | 123 | 69 | 123 | 247 | 18.230 | 46.070 |
| 343* | 28 | 164 | 212 | 176 | 132 | 123 | 69 | 123 | 247 | 18.230 | 46.070 |
| 344* | 28 | 162 | 212 | 172 | 132 | 123 | 69 | 119 | 247 | 18.230 | 46.070 |
| 345* | 28 | 162 | 212 | 172 | 132 | 123 | 69 | 161 | 247 | 18.230 | 46.070 |
| 346* | 28 | 162 | 212 | 0   | 132 | 110 | 69 | 127 | 247 | 18.230 | 46.070 |
| 347* | 28 | 164 | 212 | 148 | 132 | 123 | 71 | 124 | 247 | 18.230 | 46.070 |
| 348* | 28 | 162 | 212 | 0   | 134 | 123 | 69 | 119 | 247 | 18.230 | 46.070 |
| 349* | 28 | 162 | 212 | 172 | 134 | 123 | 73 | 129 | 247 | 18.230 | 46.070 |
| 350* | 28 | 162 | 212 | 148 | 132 | 123 | 69 | 119 | 247 | 18.230 | 46.070 |
| 351* | 28 | 164 | 212 | 172 | 132 | 123 | 67 | 123 | 247 | 18.230 | 46.070 |
| 352* | 28 | 162 | 212 | 148 | 132 | 123 | 65 | 125 | 247 | 18.230 | 46.070 |
| 353* | 28 | 182 | 212 | 172 | 132 | 123 | 71 | 125 | 247 | 18.230 | 46.070 |
| 354* | 28 | 162 | 212 | 0   | 132 | 123 | 69 | 125 | 247 | 18.230 | 46.070 |
| 355* | 28 | 162 | 212 | 0   | 132 | 123 | 67 | 125 | 247 | 18.230 | 46.070 |
| 356* | 29 | 164 | 212 | 148 | 126 | 123 | 69 | 125 | 247 | 19.700 | 44.750 |
| 357* | 29 | 164 | 212 | 174 | 132 | 123 | 69 | 125 | 247 | 19.700 | 44.750 |
| 358* | 29 | 164 | 212 | 148 | 132 | 123 | 69 | 125 | 247 | 19.700 | 44.750 |
| 359* | 29 | 164 | 212 | 174 | 132 | 123 | 69 | 125 | 247 | 19.700 | 44.750 |
| 360* | 29 | 180 | 212 | 172 | 128 | 123 | 67 | 125 | 247 | 19.700 | 44.750 |
| 361* | 29 | 162 | 212 | 166 | 132 | 123 | 71 | 125 | 247 | 19.700 | 44.750 |
| 362* | 30 | 164 | 212 | 168 | 132 | 110 | 63 | 127 | 247 | 19.880 | 44.270 |
| 363* | 30 | 166 | 0   | 168 | 132 | 123 | 63 | 127 | 247 | 19.880 | 44.270 |
| 364* | 30 | 180 | 212 | 172 | 132 | 123 | 73 | 121 | 247 | 19.880 | 44.270 |
| 365* | 30 | 164 | 212 | 172 | 132 | 110 | 65 | 127 | 247 | 19.880 | 44.270 |
| 366* | 30 | 164 | 212 | 168 | 132 | 110 | 65 | 127 | 247 | 19.880 | 44.270 |
| 367* | 30 | 166 | 0   | 172 | 132 | 123 | 0  | 0   | 247 | 19.880 | 44.270 |
| 368* | 30 | 166 | 0   | 174 | 132 | 123 | 0  | 0   | 247 | 19.880 | 44.270 |
| 369* | 31 | 0   | 212 | 148 | 132 | 123 | 63 | 125 | 247 | 21.850 | 45.090 |
| 370* | 31 | 162 | 212 | 172 | 132 | 123 | 0  | 125 | 247 | 21.850 | 45.090 |
| 371* | 31 | 162 | 212 | 172 | 132 | 123 | 65 | 123 | 247 | 21.850 | 45.090 |
| 372* | 32 | 162 | 212 | 174 | 132 | 123 | 71 | 119 | 247 | 23.820 | 44.330 |
| 373* | 32 | 162 | 212 | 172 | 132 | 123 | 67 | 117 | 247 | 23.820 | 44.330 |
| 374* | 32 | 0   | 212 | 174 | 132 | 123 | 69 | 119 | 247 | 23.820 | 44.330 |
| 375* | 32 | 162 | 212 | 172 | 132 | 123 | 65 | 121 | 247 | 23.820 | 44.330 |
| 376* | 32 | 164 | 212 | 172 | 132 | 123 | 71 | 119 | 247 | 23.820 | 44.330 |
| 377* | 32 | 162 | 212 | 174 | 132 | 123 | 71 | 127 | 247 | 23.820 | 44.330 |
| 378* | 32 | 164 | 212 | 168 | 132 | 110 | 65 | 127 | 247 | 23.820 | 44.330 |
| 379* | 32 | 162 | 212 | 170 | 132 | 123 | 67 | 117 | 247 | 23.820 | 44.330 |
| 380* | 32 | 162 | 212 | 170 | 132 | 123 | 67 | 117 | 247 | 23.820 | 44.330 |
| 381* | 32 | 162 | 212 | 170 | 132 | 123 | 67 | 117 | 247 | 23.820 | 44.330 |
| 382* | 32 | 164 | 212 | 174 | 132 | 123 | 69 | 119 | 247 | 23.820 | 44.330 |
| 383* | 32 | 164 | 212 | 170 | 132 | 123 | 71 | 119 | 247 | 23.820 | 44.330 |
| 384* | 32 | 164 | 212 | 178 | 132 | 123 | 71 | 119 | 247 | 23.820 | 44.330 |
| 385* | 32 | 162 | 212 | 174 | 132 | 123 | 69 | 127 | 247 | 23.820 | 44.330 |
| 386* | 32 | 162 | 212 | 174 | 132 | 0   | 69 | 127 | 247 | 23.820 | 44.330 |
| 387* | 32 | 164 | 212 | 176 | 132 | 110 | 65 | 125 | 247 | 23.820 | 44.330 |
| 388* | 32 | 164 | 212 | 174 | 134 | 123 | 73 | 123 | 247 | 23.820 | 44.330 |

|      |    |     |     |     |     |     |    |     |     |        |        |
|------|----|-----|-----|-----|-----|-----|----|-----|-----|--------|--------|
| 389* | 32 | 164 | 212 | 174 | 134 | 123 | 71 | 123 | 247 | 23.820 | 44.330 |
| 390* | 32 | 166 | 212 | 168 | 134 | 125 | 0  | 123 | 247 | 23.820 | 44.330 |
| 391* | 32 | 164 | 212 | 174 | 134 | 123 | 71 | 127 | 247 | 23.820 | 44.330 |
| 392* | 32 | 164 | 212 | 148 | 134 | 123 | 63 | 123 | 247 | 23.820 | 44.330 |
| 393* | 32 | 164 | 212 | 174 | 134 | 123 | 63 | 123 | 247 | 23.820 | 44.330 |
| 394* | 33 | 164 | 212 | 148 | 132 | 110 | 69 | 119 | 247 | 24.050 | 43.670 |
| 395* | 33 | 162 | 212 | 148 | 132 | 110 | 69 | 119 | 247 | 24.050 | 43.670 |
| 396* | 33 | 164 | 212 | 172 | 132 | 0   | 69 | 119 | 247 | 24.050 | 43.670 |
| 397* | 33 | 162 | 212 | 170 | 134 | 123 | 63 | 121 | 247 | 24.050 | 43.670 |
| 398* | 33 | 162 | 212 | 170 | 134 | 123 | 63 | 121 | 247 | 24.050 | 43.670 |
| 399* | 33 | 162 | 212 | 170 | 134 | 123 | 63 | 123 | 247 | 24.050 | 43.670 |
| 400* | 34 | 162 | 212 | 172 | 132 | 0   | 69 | 119 | 247 | 26.520 | 43.530 |
| 401* | 34 | 162 | 212 | 148 | 132 | 123 | 69 | 0   | 247 | 26.520 | 43.530 |
| 402* | 34 | 162 | 212 | 148 | 132 | 123 | 69 | 117 | 247 | 26.520 | 43.530 |
| 403* | 34 | 162 | 212 | 172 | 134 | 123 | 63 | 121 | 247 | 26.520 | 43.530 |
| 404* | 34 | 162 | 212 | 172 | 134 | 123 | 63 | 121 | 247 | 26.520 | 43.530 |
| 405* | 34 | 162 | 212 | 170 | 0   | 123 | 63 | 123 | 247 | 26.520 | 43.530 |
| 406* | 35 | 164 | 212 | 172 | 132 | 123 | 71 | 121 | 247 | 21.270 | 40.520 |
| 407* | 35 | 164 | 212 | 146 | 134 | 123 | 71 | 121 | 247 | 21.270 | 40.520 |
| 408* | 35 | 164 | 212 | 176 | 132 | 123 | 67 | 123 | 247 | 21.270 | 40.520 |
| 409* | 35 | 162 | 212 | 142 | 132 | 123 | 73 | 125 | 247 | 21.270 | 40.520 |
| 410* | 35 | 156 | 212 | 144 | 132 | 125 | 65 | 127 | 247 | 21.270 | 40.520 |
| 411* | 35 | 162 | 212 | 142 | 132 | 123 | 81 | 127 | 247 | 21.270 | 40.520 |
| 412* | 35 | 156 | 212 | 142 | 132 | 127 | 65 | 127 | 247 | 21.270 | 40.520 |
| 413* | 35 | 164 | 212 | 142 | 136 | 110 | 75 | 121 | 247 | 21.270 | 40.520 |
| 414* | 35 | 162 | 212 | 142 | 132 | 123 | 81 | 127 | 247 | 21.270 | 40.520 |
| 415* | 35 | 162 | 212 | 142 | 132 | 110 | 65 | 125 | 247 | 21.270 | 40.520 |
| 416* | 35 | 162 | 212 | 142 | 132 | 121 | 65 | 125 | 247 | 21.270 | 40.520 |
| 417* | 35 | 164 | 212 | 144 | 132 | 125 | 0  | 125 | 247 | 21.270 | 40.520 |
| 418* | 35 | 162 | 212 | 172 | 132 | 123 | 65 | 121 | 247 | 21.270 | 40.520 |
| 419* | 35 | 164 | 212 | 0   | 136 | 110 | 0  | 125 | 247 | 21.270 | 40.520 |
| 420* | 35 | 164 | 212 | 170 | 136 | 110 | 0  | 125 | 247 | 21.270 | 40.520 |
| 421* | 35 | 164 | 212 | 144 | 132 | 125 | 0  | 125 | 247 | 21.270 | 40.520 |
| 422* | 35 | 162 | 212 | 142 | 132 | 123 | 81 | 127 | 247 | 21.270 | 40.520 |
| 423* | 35 | 162 | 212 | 142 | 132 | 123 | 81 | 127 | 247 | 21.270 | 40.520 |
| 424* | 36 | 162 | 212 | 174 | 134 | 123 | 63 | 125 | 247 | 22.270 | 40.320 |
| 425* | 36 | 162 | 212 | 174 | 0   | 110 | 65 | 0   | 247 | 22.270 | 40.320 |
| 426* | 36 | 166 | 212 | 172 | 0   | 123 | 73 | 129 | 247 | 22.270 | 40.320 |
| 427* | 36 | 162 | 212 | 174 | 132 | 123 | 71 | 127 | 247 | 22.270 | 40.320 |
| 428* | 36 | 164 | 212 | 174 | 132 | 110 | 67 | 125 | 247 | 22.270 | 40.320 |
| 429* | 36 | 162 | 212 | 174 | 132 | 125 | 67 | 0   | 247 | 22.270 | 40.320 |

"0" indicates the missing data (no pCR amplification). \* indicates new samples genotyped in this study.

\*\*locus MA13 was genotyped in all samples.
