# Supplementary material
Source: MDPI journal article supplement (https://www.mdpi.com/1424-2818/12/2/44)
Supplement: s1 [file s1]

**Supplementary Table S6.** AMOVA analysis among all populations and considering two regional groups of populations (Italy, and Balkans/Pannonia).

| AMOVA among populations                        |                                 |      |                |                     |                         |
|------------------------------------------------|---------------------------------|------|----------------|---------------------|-------------------------|
|                                                | Source of variation             | d.f. | Sum of squares | Variance components | Percentage of variation |
| FST=0.169<br>(P < 0.001)                       | Among populations               | 35   | 210.601        | 0.36006 Va          | 16.88                   |
|                                                | Within populations              | 393  | 696.574        | 1.77245 Vb          | 83.12                   |
|                                                | total                           | 428  | 907.175        | 2.13251             |                         |
| RST=0.422<br>(P < 0.001)                       | Among populations               | 35   | 274559.909     | 596.21249 Va        | 42.22                   |
|                                                | Within populations              | 393  | 320614.592     | 815.81321 Vb        | 57.78                   |
|                                                | total                           | 428  | 595174.501     | 1412.02570          |                         |
| AMOVA among two regional groups of populations |                                 |      |                |                     |                         |
| FST= 0.212<br>(P < 0.001)                      | Among groups                    | 1    | 30.639         | 0.17541 Va          | 7.80                    |
|                                                | Among populations within groups | 34   | 179.962        | 0.30059 Vb          | 13.37                   |
|                                                | Within populations              | 393  | 696.574        | 1.77245 Vc          | 78.83                   |
|                                                | Total                           | 428  | 907.175        | 2.24844             |                         |
| RST = 0.427<br>(P < 0.001)                     | Among groups                    | 1    | 11937.956      | 18.80484 Va         | 1.32                    |
|                                                | Among populations within groups | 34   | 262621.953     | 589.83670 Vb        | 41.41                   |
|                                                | Within populations              | 393  | 320614.592     | 815.81321 Vc        | 57.27                   |
|                                                | Total                           | 428  | 595174.501     | 1424.45476          |                         |
